# Supplementary material for: Post-COVID symptom profiles and duration in a global convalescent COVID-19 observational cohort: Correlations with demographics, medical history, acute COVID-19 severity and global region
Source: PubMed Central journal article supplement (PMC10289480; doi:10.7189/jogh.13.06020), 2023-06-23

## Supplementary Material

### HVTN 405/HPTN 1901 Study Team, Clinical Research Sites and Investigators of Record

Srilatha Edupuganti (Hope Clinic, Atlanta, GA); Valeria Cantos Lucio (Ponce de Leon, Atlanta, GA); Jason Farley (Johns Hopkins, Baltimore, MD); Paul A. Goepfert (Birmingham, AL); Lindsey R. Baden (Brigham and Womens Hospital, Boston, MA); Kenneth H. Mayer (Fenway Health, Boston, MA); Cynthia Gay (Chapel Hill, NC); Temitope Oyedele (AYAR at CORE, Chicago, IL); Juan Carlos Hinojosa Boyer (Asociacion Civil Selva Amazonica, Iquitos, Peru); Javier R. Lama (Barranco, Lima, Peru); Juan Jose Montenegro Idrogo (San Marcos/CITBM, Lima, Peru); Pedro Gonzales (San Miguel, Lima, Peru); Robinson Cabello (Via Libre, Lima, Peru); Raphael Landovitz (UCLA CARE Center, Los Angeles, CA); Spyros A. Kalams (Vanderbilt, Nashville, TN); Susan Abdalian (Adolescent Trials Unit, New Orleans, LA); Ellen Morrison (Bronx Prevention Center, New York, NY); Yael Hirsch-Moverman (Harlem Prevention Center, New York, NY); Hong Van Tieu (NY Blood Center, New York, NY); Magdalena Sobieszczyk (Physicians & Surgeons, New York, NY); Shobha Swaminathan (New Jersey Medical School, Newark, NJ); Ian Frank (Penn Prevention, Philadelphia, PA); Michael Keefer (University of Rochester, Rochester, NY); Susan P. Buchbinder (Bridge HIV, San Francisco, CA); M. Juliana McElrath (Seattle Vaccine Trials Unit, Seattle, WA); Manya Magnus (George Washington, Washington, DC); Terence Tafatatha (Lilongwe, Malawi); Zaheer Hoosain (Bloemfontein, South Africa); Gonasagrie Nair and Llewellyn Fleurs (Emavundleni, Cape Town, South Africa); Sheetal Kassim (Groote Schuur, Cape Town, South Africa); Amy Ward and Graeme Meintjes (Khayelitsha, Cape Town, South Africa); Elizabeth Spooner (Botha's Hill and Tongaat, Durban, South Africa); Brodie Daniels (Chatsworth, Durban, South Africa); Nigel Garrett (eThekweni, Durban, South Africa); Brodie Daniels (Isipingo and Verulam, Durban, South Africa); Craig Innes (Klerksdorp, South Africa); Philip Kotze (Ladysmith, South Africa); Sheena Kotze (Mamelodi, South Africa); Katherine Gill (Masiphumelele, South Africa); Pamela Mda (Mthatha, South Africa); William Brumskine (Rustenburg, South Africa); Khatija Ahmed (Soshanguve, South Africa); Fatima Laher (Bara, Soweto, South Africa); Tricia Philip, Erica Lazarus and Anusha Nana (Kliptown, Soweto, South Africa); Modulakgotla Sebe (Clinic 3, Tembisa, South Africa); Kathryn Mngadi (Clinica 4, Tembisa, South Africa); Halima Dawood (Vulindlela, South Africa); Roma Chilengi and Katanekwa Njekwa (Matero, Lusaka, Zambia); Portia Hunidzarira and Nuchaneta Bhondai-Mhuri (Seke South, Harare, Zimbabwe); Portia Hunidzarira and Lynda Stranix-Chibanda (St. Mary's, Harare, Zimbabwe); and Portia Hunidzarira and Nyaradzo Mgodzi (Zengeza, Harare, Zimbabwe).

## Tables

**Supplemental Table 1. Eligibility criteria.**

|                                                                                                                                                               |
|---------------------------------------------------------------------------------------------------------------------------------------------------------------|
| Age 18 or older                                                                                                                                               |
| Reports having had a positive test for SARS-CoV-2                                                                                                             |
| Reports resolution of COVID-19 within 1-8 weeks of enrollment or, if asymptomatic infection, reports positive SARS-CoV-2 test within 2-10 weeks of enrollment |
| Access to a participating HVTN or HPTN CRS and willingness to be followed for the planned duration of the study                                               |
| Ability and willingness to provide informed consent                                                                                                           |
| Assessment of understanding: volunteer demonstrates understanding of the study                                                                                |
| Volunteers who were assigned female sex at birth and able to have children: negative pregnancy test within 4 days of enrollment visit                         |

**Supplemental Table 2. Trial schema.**

| Group    |                                                                                                                                                                                                                                                                                                                              | N          |
|----------|------------------------------------------------------------------------------------------------------------------------------------------------------------------------------------------------------------------------------------------------------------------------------------------------------------------------------|------------|
| <b>1</b> | <b>Persons not hospitalized for COVID-19, without clinical spectrum or outcomes specified in group 3</b>                                                                                                                                                                                                                     | <b>439</b> |
| 1A       | Persons with asymptomatic infection, ages 18 through 55, inclusive                                                                                                                                                                                                                                                           | 129        |
| 1B       | Persons with asymptomatic infection, age >55                                                                                                                                                                                                                                                                                 | 51         |
| 1C       | Persons with symptomatic infection (i.e., COVID-19), ages 18 through 55                                                                                                                                                                                                                                                      | 182        |
| 1D       | Persons with symptomatic infection (i.e., COVID-19), age >55                                                                                                                                                                                                                                                                 | 77         |
| <b>2</b> | <b>Persons previously hospitalized for COVID-19, without clinical spectrum or outcomes specified in group 3</b>                                                                                                                                                                                                              | <b>196</b> |
| 2A       | Persons 18 through 55 years of age                                                                                                                                                                                                                                                                                           | 122        |
| 2B       | Persons >55 years of age                                                                                                                                                                                                                                                                                                     | 74         |
| <b>3</b> | <b>Persons with specific clinical spectrums or outcomes, regardless of hospitalization history (e.g., persons recovered after intubation, with prolonged viral shedding, with myocarditis/pericarditis, with rapid recovery from COVID-19, with a second positive SARS-CoV-2 RT-PCR test result after a negative result)</b> | <b>125</b> |

**Supplemental Table 3. Clinical research site IRB name and number.**

| Site name                                         | DAIDS ID | IRB name and no                                 |
|---------------------------------------------------|----------|-------------------------------------------------|
| Atlanta - Hope Clinic CRS                         | 31440    | Advarra SSU00120200                             |
| Atlanta - Ponce de Leon Center CRS                | 5802     | Advarra SSU00120348                             |
| Baltimore – Johns Hopkins University CRS          | 201      | Advarra SSU00121119                             |
| Birmingham                                        | 31788    | Advarra SSU00121044                             |
| Boston – Brigham and Women’s Hospital Vaccine CRS | 30007    | Advarra SSU00120468                             |
| Boston - Fenway Health CRS                        | 31785    | Advarra SSU00120279                             |
| Chapel Hill                                       | 3201     | Advarra SSU00120346                             |
| Chicago                                           | 31958    | Advarra SSU00120225                             |
| Los Angeles – UCLA                                | 601      | Advarra SSU00120421                             |
| Nashville                                         | 30352    | Advarra SSU00120455                             |
| New Orleans                                       | 31959    | Advarra SSU00120321                             |
| New York – Bronx                                  | 30261    | Advarra SSU00121076                             |
| New York – Harlem                                 | 30276    | Advarra SSU00120537                             |
| New York - NYBC                                   | 31801    | Advarra SSU00120370                             |
| New York – P&S                                    | 30329    | Advarra SSU00120439                             |
| Newark                                            | 31786    | Advarra SSU00120472                             |
| Philadelphia                                      | 30310    | Advarra SSU00121269                             |
| Rochester                                         | 31467    | Advarra SSU00121683                             |
| San Francisco - Bridge                            | 30305    | Advarra SSU00120245                             |
| Seattle                                           | 30331    | Advarra SSU00120499                             |
| Washington DC                                     | 31608    | Advarra SSU00120668                             |
| Lilongwe Malawi CR3025                            | 12001    | Ministry of health and population 2578          |
| ACSA CRS                                          | 30259    | Institution committee of bioethics 0052-2020-CE |
| Lima - San Marcos/CITBM CRS                       | 31970    | Committee of Bioethics (CIB) 5591               |
| Lima - Barranco                                   | 11301    | Institution committee of bioethics 0050-2020-CE |
| Lima - San Miguel CRS                             | 11302    | Institution committee of bioethics 0051-2020-CE |
| Lima – Via Libre CRS                              | 31909    | Committee of Bioethics (CIB) 5592               |
| Bloemfontein                                      | 32045    | University of the Witwatersrand IRB 00001223    |
| Cape Town - Emavundleni                           | 30346    | University of Cape Town HREC 345/2020           |
| Cape Town – Groote Schuur                         | 31708    | University of Cape Town HREC 346/2020           |
| Cape Town - Khayelitsha                           | 31941    | University of Cape Town HREC 344/2020           |
| Durban - Botha’s Hill                             | 31445    | SAMRC Durban Westville EC024-7/20202            |
| Durban - Chatsworth                               | 30302    | SAMRC Durban Westville EC024-7/20202            |
| Durban - eThekweni                                | 31422    | BREC 00001464                                   |
| Durban - Isipingo                                 | 31635    | SAMRC Durban Westville EC024-7/20202            |

|                     |       |                                                 |
|---------------------|-------|-------------------------------------------------|
| Durban - Tongaat    | 31662 | SAMRC Durban Westville EC024-7/20202            |
| Durban - Verulam    | 31663 | SAMRC Durban Westville EC024-7/20202            |
| Klerksdorp          | 30325 | University of the Witwatersrand<br>IRB 00001223 |
| Ladysmith           | 31913 | University of the Witwatersrand<br>IRB 00001223 |
| Mamelodi            | 31984 | University of the Witwatersrand<br>IRB 00001223 |
| Masiphumelele       | 32023 | University of Cape Town HREC<br>356/2020        |
| Mthatha             | 31955 | University of the Witwatersrand<br>IRB 00001223 |
| Rustenburg          | 31684 | University of the Witwatersrand<br>IRB 00001223 |
| Soshanguve          | 31829 | University of the Witwatersrand<br>IRB 00001223 |
| Soweto - Bara       | 30351 | University of the Witwatersrand<br>IRB 00001223 |
| Soweto – Kliptown   | 31928 | University of the Witwatersrand<br>IRB 00001223 |
| Tembisa – Clinic 3  | 31832 | University of the Witwatersrand<br>IRB 00001223 |
| Tembisa – Clinic 4  | 32047 | University of the Witwatersrand<br>IRB 00001223 |
| Vulindlela          | 31448 | University of the Witwatersrand<br>IRB 00001223 |
| Lusaka- Matero      | 30290 | UNZA BREC                                       |
| Harare – Seke South | 30294 | JREC JREC/137/2020                              |
| Harare - St. Mary's | 30303 | JREC JREC/137/2020                              |
| Harare - Zengeza    | 30320 | JREC JREC/137/2020                              |

**Supplemental Table 4. Associations of COVID-19 severity, medical co-morbidities, and demographics with persistence beyond acute COVID-19 resolution and duration of any symptoms among symptomatic participants by region.**

| <b>A. Americas Cohort</b>           |                                                     |                     |                |                 |                         |                     |                |                 |
|-------------------------------------|-----------------------------------------------------|---------------------|----------------|-----------------|-------------------------|---------------------|----------------|-----------------|
| <b>Comparison<sup>+</sup></b>       | <b>Persistence Beyond Acute COVID-19 Resolution</b> |                     |                |                 | <b>Symptom Duration</b> |                     |                |                 |
|                                     | <b>OR</b>                                           | <b>95% CI</b>       | <b>P-Value</b> | <b>Q-Value*</b> | <b>GMR</b>              | <b>95% CI</b>       | <b>P-Value</b> | <b>Q-Value*</b> |
| COVID-19 Severity (Overall Test)    | -                                                   | -                   | 0.107          | 0.287           | -                       | -                   | < <b>0.001</b> | < <b>0.001</b>  |
| NIOR vs NOR                         | 1.88                                                | [1.04, 3.46]        | 0.037          | 0.287           | <b>1.67</b>             | <b>[1.36, 2.05]</b> | < <b>0.001</b> | < <b>0.001</b>  |
| IOR vs NOR                          | 1.62                                                | [0.64, 4.06]        | 0.303          | 0.538           | <b>1.71</b>             | <b>[1.27, 2.31]</b> | < <b>0.001</b> | <b>0.002</b>    |
| IOR vs NIOR                         | 0.86                                                | [0.33, 2.22]        | 0.76           | 0.936           | 1.03                    | [0.75, 1.4]         | 0.871          | 0.894           |
| Age (>55 vs 18-55)                  | 1.83                                                | [1.07, 3.17]        | 0.029          | 0.287           | <b>1.32</b>             | <b>[1.09, 1.58]</b> | <b>0.004</b>   | <b>0.013</b>    |
| Sex at Birth (Male vs Female)       | 0.9                                                 | [0.52, 1.56]        | 0.708          | 0.936           | 0.88                    | [0.73, 1.06]        | 0.182          | 0.365           |
| BMI (≥30 vs <30)                    | 1.49                                                | [0.87, 2.58]        | 0.146          | 0.33            | <b>1.25</b>             | <b>[1.04, 1.51]</b> | <b>0.02</b>    | <b>0.054</b>    |
| COPD/Emphysema/Asthma               | 2.1                                                 | [0.92, 5]           | 0.078          | 0.287           | <b>1.54</b>             | <b>[1.16, 2.06]</b> | <b>0.003</b>   | <b>0.013</b>    |
| Diabetes                            | 1.07                                                | [0.49, 2.32]        | 0.872          | 0.955           | 0.88                    | [0.67, 1.16]        | 0.363          | 0.528           |
| Hypertension                        | 0.88                                                | [0.46, 1.67]        | 0.69           | 0.936           | 0.81                    | [0.65, 1.01]        | 0.06           | 0.137           |
| HIV/AIDS                            | 1.02                                                | [0.44, 2.38]        | 0.955          | 0.955           | 1.07                    | [0.8, 1.44]         | 0.637          | 0.783           |
| Prolonged Viral Shedding            | 2.02                                                | [0.89, 4.69]        | 0.094          | 0.287           | 1.17                    | [0.87, 1.56]        | 0.299          | 0.479           |
| Current Cigarettes/Marijuana Smoker | 0.64                                                | [0.25, 1.63]        | 0.345          | 0.552           | 0.98                    | [0.7, 1.37]         | 0.894          | 0.894           |
| Ever Cigarettes/Marijuana Smoker    | 0.98                                                | [0.56, 1.71]        | 0.943          | 0.955           | 1.02                    | [0.84, 1.24]        | 0.848          | 0.894           |
| Non-Hispanic Black vs Non-His White | 0.45                                                | [0.18, 1.1]         | 0.079          | 0.287           | 0.89                    | [0.63, 1.26]        | 0.508          | 0.677           |
| Others vs Non-His White             | 2.04                                                | [0.76, 6.35]        | 0.165          | 0.33            | 1.21                    | [0.85, 1.73]        | 0.297          | 0.479           |
| <b>B. Africa cohort</b>             |                                                     |                     |                |                 |                         |                     |                |                 |
| COVID-19 Severity (Overall Test)    | -                                                   | -                   | 0.055          | 0.207           | -                       | -                   | 0.05           | 0.25            |
| NIOR vs NOR                         | 1.59                                                | [0.94, 2.72]        | 0.085          | 0.254           | <b>1.33</b>             | <b>[1.06, 1.67]</b> | <b>0.016</b>   | <b>0.12</b>     |
| IOR vs NOR                          | 4.49                                                | [1.15, 24.83]       | 0.03           | 0.207           | 1.22                    | [0.68, 2.18]        | 0.512          | 0.768           |
| IOR vs NIOR                         | 2.82                                                | [0.7, 15.89]        | 0.151          | 0.294           | 0.92                    | [0.5, 1.67]         | 0.774          | 0.922           |
| Age (>55 vs 18-55)                  | 0.61                                                | [0.33, 1.12]        | 0.112          | 0.28            | 0.89                    | [0.69, 1.15]        | 0.388          | 0.647           |
| Sex at Birth (Male vs Female)       | 0.95                                                | [0.57, 1.59]        | 0.845          | 0.905           | 0.94                    | [0.76, 1.17]        | 0.595          | 0.811           |
| BMI (≥30 vs <30)                    | 0.78                                                | [0.46, 1.31]        | 0.348          | 0.48            | 0.97                    | [0.78, 1.22]        | 0.799          | 0.922           |
| COPD/Emphysema/Asthma               | 1.3                                                 | [0.46, 3.71]        | 0.613          | 0.707           | 1.43                    | [0.91, 2.26]        | 0.122          | 0.366           |
| Diabetes                            | 1.3                                                 | [0.67, 2.51]        | 0.437          | 0.546           | 1.25                    | [0.95, 1.66]        | 0.117          | 0.366           |
| Hypertension                        | 1.55                                                | [0.85, 2.86]        | 0.157          | 0.294           | 1.17                    | [0.9, 1.52]         | 0.234          | 0.501           |
| HIV/AIDS                            | 0.65                                                | [0.3, 1.37]         | 0.258          | 0.429           | 0.99                    | [0.72, 1.36]        | 0.941          | 0.967           |
| Prolonged Viral Shedding            | 2.44                                                | [0.38, 25.95]       | 0.352          | 0.48            | 1.84                    | [0.77, 4.38]        | 0.17           | 0.426           |
| Current Cigarettes/Marijuana Smoker | 1.02                                                | [0.41, 2.49]        | 0.957          | 0.957           | 0.83                    | [0.56, 1.22]        | 0.345          | 0.646           |
| Ever Cigarettes/Marijuana Smoker    | 1.96                                                | [1, 3.88]           | 0.05           | 0.207           | 0.99                    | [0.74, 1.33]        | 0.967          | 0.967           |
| Others vs Non-His Black             | <b>2.11</b>                                         | <b>[1.23, 3.66]</b> | <b>0.006</b>   | <b>0.094</b>    | <b>1.37</b>             | <b>[1.09, 1.72]</b> | <b>0.007</b>   | <b>0.106</b>    |

---

†: Adjusted for a set of confounders (COVID-19 severity, age, sex assigned at birth, and region). For each of COVID-19 severity, age, sex assigned at birth, and region, the comparison was adjusted for the rest of confounders. Overall test for COVID-19 severity was done using Wald-test.

\*: Adjusted for multiple comparisons to control false discovery rate for each cohort.

**Bolded values for significant with p-value $\leq$ 0.05 and q-value $\leq$ 0.2.**

NOR: symptomatic, no oxygen requirement; NIOR: symptomatic, non-invasive oxygen requirement; IOR: symptomatic, invasive oxygen requirement

---

**Supplemental Table 5. Associations of COVID-19 Severity, medical co-morbidities, and demographics with persistence beyond acute COVID-19 resolution and duration of any symptom in each body system among all symptomatic participants.**

| Body System                  | Comparison <sup>+</sup>                  | Persistence Beyond Acute COVID-19 Resolution |                      |                  |                  | Symptom Duration    |                     |                  |                  |
|------------------------------|------------------------------------------|----------------------------------------------|----------------------|------------------|------------------|---------------------|---------------------|------------------|------------------|
|                              |                                          | OR                                           | 95% CI               | P-Value          | Q-Value*         | GMR                 | 95% CI              | P-Value          | Q-Value*         |
| General                      | COVID-19 Severity (Overall Test)         | -                                            | -                    | <b>0.009</b>     | <b>0.029</b>     | -                   | -                   | <b>&lt;0.001</b> | <b>&lt;0.001</b> |
|                              | NIOR vs NOR                              | 1.53                                         | [0.98, 2.39]         | 0.064            | 0.134            | <b>1.43</b>         | <b>[1.22, 1.68]</b> | <b>&lt;0.001</b> | <b>&lt;0.001</b> |
|                              | IOR vs NOR                               | <b>3.38</b>                                  | <b>[1.45, 8.01]</b>  | <b>0.005</b>     | <b>0.018</b>     | <b>1.7</b>          | <b>[1.28, 2.25]</b> | <b>&lt;0.001</b> | <b>0.001</b>     |
|                              | IOR vs NIOR                              | 2.21                                         | [0.93, 5.36]         | 0.073            | 0.14             | 1.19                | [0.89, 1.59]        | 0.253            | 0.323            |
|                              | Age (>55 vs 18-55)                       | 1.32                                         | [0.83, 2.07]         | 0.24             | 0.368            | 1.15                | [0.98, 1.35]        | 0.096            | 0.158            |
|                              | Sex at Birth (Male vs Female)            | 0.88                                         | [0.57, 1.36]         | 0.571            | 0.773            | 0.89                | [0.76, 1.03]        | 0.127            | 0.195            |
|                              | BMI (≥30 vs <30)                         | 0.92                                         | [0.6, 1.42]          | 0.72             | 0.872            | 1.1                 | [0.94, 1.28]        | 0.241            | 0.323            |
|                              | COPD/Emphysema/Asthma                    | <b>2.94</b>                                  | <b>[1.48, 5.92]</b>  | <b>0.002</b>     | <b>0.01</b>      | <b>1.58</b>         | <b>[1.21, 2.06]</b> | <b>0.001</b>     | <b>0.002</b>     |
|                              | Diabetes                                 | 0.96                                         | [0.54, 1.68]         | 0.887            | 0.956            | 0.94                | [0.76, 1.17]        | 0.589            | 0.677            |
|                              | Hypertension                             | 1.03                                         | [0.63, 1.66]         | 0.918            | 0.956            | 0.98                | [0.82, 1.17]        | 0.826            | 0.864            |
|                              | HIV/AIDS                                 | 1.02                                         | [0.55, 1.84]         | 0.956            | 0.956            | 1.07                | [0.86, 1.34]        | 0.532            | 0.644            |
|                              | Prolonged Viral Shedding                 | 1.97                                         | [0.87, 4.42]         | 0.101            | 0.166            | 1.32                | [0.99, 1.77]        | 0.063            | 0.121            |
|                              | Current Cigarettes/Marijuana Smoker      | 1.14                                         | [0.56, 2.27]         | 0.707            | 0.872            | 0.78                | [0.6, 1.03]         | 0.076            | 0.134            |
|                              | Ever Cigarettes/Marijuana Smoker         | <b>1.71</b>                                  | <b>[1.05, 2.8]</b>   | <b>0.033</b>     | <b>0.083</b>     | 1                   | [0.84, 1.19]        | 0.993            | 0.993            |
|                              | Non-Hispanic Black vs Non-Hispanic White | <b>0.46</b>                                  | <b>[0.22, 0.92]</b>  | <b>0.027</b>     | <b>0.079</b>     | <b>0.72</b>         | <b>[0.55, 0.95]</b> | <b>0.023</b>     | <b>0.047</b>     |
|                              | Others vs Non-His White                  | 0.93                                         | [0.46, 1.87]         | 0.835            | 0.956            | 1.05                | [0.79, 1.4]         | 0.737            | 0.807            |
|                              | Region (Overall Test)                    | -                                            | -                    | <b>&lt;0.001</b> | <b>&lt;0.001</b> | -                   | -                   | <b>&lt;0.001</b> | <b>&lt;0.001</b> |
|                              | USA vs Peru                              | <b>20.77</b>                                 | <b>[8.81, 59.63]</b> | <b>&lt;0.001</b> | <b>&lt;0.001</b> | <b>2.16</b>         | <b>[1.77, 2.64]</b> | <b>&lt;0.001</b> | <b>&lt;0.001</b> |
|                              | Non-RSA vs RSA                           | 0.79                                         | [0.41, 1.48]         | 0.464            | 0.668            | 0.87                | [0.68, 1.11]        | 0.25             | 0.323            |
|                              | RSA vs Peru                              | <b>13.84</b>                                 | <b>[5.81, 40.01]</b> | <b>&lt;0.001</b> | <b>&lt;0.001</b> | <b>1.56</b>         | <b>[1.28, 1.9]</b>  | <b>&lt;0.001</b> | <b>&lt;0.001</b> |
| Non-RSA vs Peru              | <b>10.91</b>                             | <b>[4.07, 33.87]</b>                         | <b>&lt;0.001</b>     | <b>&lt;0.001</b> | <b>1.35</b>      | <b>[1.05, 1.75]</b> | <b>0.022</b>        | <b>0.047</b>     |                  |
| RSA vs USA                   | 0.67                                     | [0.42, 1.07]                                 | 0.091                | 0.161            | <b>0.72</b>      | <b>[0.6, 0.87]</b>  | <b>0.001</b>        | <b>0.002</b>     |                  |
| Non-RSA vs USA               | <b>0.53</b>                              | <b>[0.27, 1]</b>                             | <b>0.049</b>         | <b>0.113</b>     | <b>0.63</b>      | <b>[0.49, 0.81]</b> | <b>&lt;0.001</b>    | <b>0.001</b>     |                  |
| Central Nervous System (CNS) | COVID-19 Severity (Overall Test)         | -                                            | -                    | 0.077            | 0.268            | -                   | -                   | <b>&lt;0.001</b> | <b>0.001</b>     |
|                              | NIOR vs NOR                              | <b>1.73</b>                                  | <b>[1.07, 2.79]</b>  | <b>0.026</b>     | <b>0.119</b>     | <b>1.4</b>          | <b>[1.17, 1.67]</b> | <b>&lt;0.001</b> | <b>0.001</b>     |
|                              | IOR vs NOR                               | 0.99                                         | [0.29, 2.84]         | 0.989            | 0.989            | <b>1.53</b>         | <b>[1.09, 2.15]</b> | <b>0.014</b>     | <b>0.035</b>     |
|                              | IOR vs NIOR                              | 0.57                                         | [0.16, 1.69]         | 0.324            | 0.479            | 1.1                 | [0.77, 1.57]        | 0.608            | 0.737            |

|                        |                                          |              |                        |                  |                  |             |                     |                  |                  |
|------------------------|------------------------------------------|--------------|------------------------|------------------|------------------|-------------|---------------------|------------------|------------------|
|                        | Age (>55 vs 18-55)                       | 1.24         | [0.74, 2.04]           | 0.413            | 0.531            | 1.06        | [0.89, 1.27]        | 0.509            | 0.651            |
|                        | Sex at Birth (Male vs Female)            | 0.74         | [0.46, 1.18]           | 0.212            | 0.479            | <b>0.76</b> | <b>[0.65, 0.9]</b>  | <b>0.002</b>     | <b>0.005</b>     |
|                        | BMI ( $\geq 30$ vs <30)                  | 0.89         | [0.56, 1.42]           | 0.634            | 0.722            | 1.14        | [0.97, 1.35]        | 0.122            | 0.255            |
|                        | COPD/Emphysema/Asthma                    | 1.43         | [0.69, 2.9]            | 0.333            | 0.479            | <b>1.57</b> | <b>[1.18, 2.08]</b> | <b>0.002</b>     | <b>0.005</b>     |
|                        | Diabetes                                 | 1.35         | [0.73, 2.47]           | 0.332            | 0.479            | 1.13        | [0.89, 1.43]        | 0.316            | 0.468            |
|                        | Hypertension                             | 1.34         | [0.79, 2.26]           | 0.268            | 0.479            | 1           | [0.82, 1.22]        | 0.998            | 0.998            |
|                        | HIV/AIDS                                 | 0.66         | [0.32, 1.28]           | 0.222            | 0.479            | 1.06        | [0.83, 1.35]        | 0.66             | 0.759            |
|                        | Prolonged Viral Shedding                 | 1.54         | [0.64, 3.52]           | 0.325            | 0.479            | 1.2         | [0.87, 1.64]        | 0.27             | 0.444            |
|                        | Current Cigarettes/Marijuana Smoker      | 0.85         | [0.38, 1.82]           | 0.691            | 0.722            | 0.9         | [0.67, 1.21]        | 0.481            | 0.65             |
|                        | Ever Cigarettes/Marijuana Smoker         | 1.61         | [0.94, 2.76]           | 0.081            | 0.268            | 1.02        | [0.85, 1.24]        | 0.803            | 0.879            |
|                        | Non-Hispanic Black vs Non-Hispanic White | 0.52         | [0.24, 1.12]           | 0.097            | 0.278            | 0.85        | [0.62, 1.17]        | 0.326            | 0.468            |
|                        | Others vs Non-His White                  | 1.29         | [0.61, 2.74]           | 0.501            | 0.606            | 1.2         | [0.87, 1.65]        | 0.266            | 0.444            |
|                        | Region (Overall Test)                    | -            | -                      | <b>&lt;0.001</b> | <b>0.001</b>     | -           | -                   | <b>&lt;0.001</b> | <b>&lt;0.001</b> |
|                        | USA vs Peru                              | <b>38.72</b> | <b>[10.09, 347.37]</b> | <b>&lt;0.001</b> | <b>&lt;0.001</b> | <b>1.79</b> | <b>[1.43, 2.23]</b> | <b>&lt;0.001</b> | <b>&lt;0.001</b> |
|                        | Non-RSA vs RSA                           | 0.76         | [0.38, 1.45]           | 0.415            | 0.531            | 1.18        | [0.91, 1.54]        | 0.209            | 0.401            |
|                        | RSA vs Peru                              | <b>34.65</b> | <b>[9.06, 310.52]</b>  | <b>&lt;0.001</b> | <b>&lt;0.001</b> | <b>1.49</b> | <b>[1.2, 1.85]</b>  | <b>&lt;0.001</b> | <b>0.001</b>     |
|                        | Non-RSA vs Peru                          | <b>26.41</b> | <b>[6.25, 245.41]</b>  | <b>&lt;0.001</b> | <b>&lt;0.001</b> | <b>1.76</b> | <b>[1.33, 2.33]</b> | <b>&lt;0.001</b> | <b>0.001</b>     |
|                        | RSA vs USA                               | 0.89         | [0.54, 1.47]           | 0.662            | 0.722            | 0.83        | [0.68, 1.03]        | 0.09             | 0.207            |
|                        | Non-RSA vs USA                           | 0.68         | [0.34, 1.34]           | 0.268            | 0.479            | 0.99        | [0.75, 1.3]         | 0.93             | 0.973            |
| Gastrointestinal (GIT) | COVID-19 Severity (Overall Test)         | -            | -                      | 0.327            | 0.502            | -           | -                   | 0.066            | 0.253            |
|                        | NIOR vs NOR                              | 1.33         | [0.67, 2.58]           | 0.405            | 0.547            | <b>1.23</b> | <b>[1.01, 1.49]</b> | <b>0.041</b>     | <b>0.187</b>     |
|                        | IOR vs NOR                               | 2.31         | [0.65, 6.91]           | 0.18             | 0.298            | 1.32        | [0.91, 1.92]        | 0.145            | 0.371            |
|                        | IOR vs NIOR                              | 1.73         | [0.48, 5.39]           | 0.379            | 0.544            | 1.08        | [0.73, 1.59]        | 0.706            | 0.921            |
|                        | Age (>55 vs 18-55)                       | 1.04         | [0.52, 2.03]           | 0.913            | 0.928            | 1.02        | [0.84, 1.24]        | 0.841            | 0.921            |
|                        | Sex at Birth (Male vs Female)            | <b>0.49</b>  | <b>[0.24, 0.96]</b>    | <b>0.038</b>     | <b>0.18</b>      | 0.81        | [0.68, 0.98]        | 0.03             | 0.171            |
|                        | BMI ( $\geq 30$ vs <30)                  | 1.03         | [0.54, 1.97]           | 0.928            | 0.928            | 1.15        | [0.96, 1.39]        | 0.136            | 0.371            |
|                        | COPD/Emphysema/Asthma                    | 2.22         | [0.92, 5.07]           | 0.074            | 0.213            | 1.12        | [0.82, 1.54]        | 0.468            | 0.718            |
|                        | Diabetes                                 | 0.86         | [0.32, 2.03]           | 0.74             | 0.852            | 1.13        | [0.87, 1.46]        | 0.367            | 0.703            |
|                        | Hypertension                             | 0.56         | [0.24, 1.2]            | 0.14             | 0.277            | 1.03        | [0.82, 1.28]        | 0.815            | 0.921            |
|                        | HIV/AIDS                                 | 1.44         | [0.56, 3.31]           | 0.428            | 0.547            | 1           | [0.75, 1.33]        | 0.988            | 0.988            |
|                        | Prolonged Viral Shedding                 | <b>4.52</b>  | <b>[1.66, 11.78]</b>   | <b>0.004</b>     | <b>0.045</b>     | 1.24        | [0.87, 1.78]        | 0.238            | 0.547            |
|                        | Current Cigarettes/Marijuana Smoker      | <b>0.12</b>  | <b>[0, 0.92]</b>       | <b>0.039</b>     | <b>0.18</b>      | 0.84        | [0.59, 1.19]        | 0.323            | 0.676            |
|                        | Ever Cigarettes/Marijuana Smoker         | 0.54         | [0.24, 1.14]           | 0.107            | 0.266            | 1.03        | [0.84, 1.26]        | 0.776            | 0.921            |



|                                           |                                          |               |                     |                  |              |                    |                     |                  |                  |
|-------------------------------------------|------------------------------------------|---------------|---------------------|------------------|--------------|--------------------|---------------------|------------------|------------------|
|                                           | Non-Hispanic Black vs Non-Hispanic White | 0.78          | [0.26, 2.19]        | 0.641            | 0.776        | 0.95               | [0.67, 1.36]        | 0.797            | 0.921            |
|                                           | Others vs Non-His White                  | 0.44          | [0.13, 1.31]        | 0.145            | 0.277        | 1.1                | [0.77, 1.57]        | 0.605            | 0.87             |
|                                           | Region (Overall Test)                    | -             | -                   | 0.012            | 0.089        | -                  | -                   | <b>0.016</b>     | <b>0.171</b>     |
|                                           | USA vs Peru                              | <b>5.24</b>   | <b>[1.99, 17.2]</b> | <b>&lt;0.001</b> | <b>0.011</b> | <b>1.31</b>        | <b>[1.03, 1.66]</b> | <b>0.026</b>     | <b>0.171</b>     |
|                                           | Non-RSA vs RSA                           | 0.91          | [0.29, 2.48]        | 0.859            | 0.928        | 1.12               | [0.83, 1.5]         | 0.457            | 0.718            |
|                                           | RSA vs Peru                              | 2.67          | [0.93, 9.2]         | 0.068            | 0.213        | 0.91               | [0.71, 1.16]        | 0.453            | 0.718            |
|                                           | Non-RSA vs Peru                          | 2.43          | [0.65, 9.52]        | 0.181            | 0.298        | 1.02               | [0.75, 1.38]        | 0.907            | 0.949            |
|                                           | RSA vs USA                               | 0.51          | [0.24, 1.06]        | 0.072            | 0.213        | <b>0.69</b>        | <b>[0.55, 0.88]</b> | <b>0.002</b>     | <b>0.055</b>     |
|                                           | Non-RSA vs USA                           | 0.46          | [0.15, 1.2]         | 0.116            | 0.266        | 0.78               | [0.58, 1.05]        | 0.096            | 0.315            |
| Head, Eyes, Ears, Nose and Throat (HEENT) | COVID-19 Severity (Overall Test)         | -             | -                   | 0.39             | 0.535        | -                  | -                   | 0.126            | 0.362            |
|                                           | NIOR vs NOR                              | 1.53          | [0.65, 3.44]        | 0.321            | 0.535        | 1.26               | [1.01, 1.56]        | 0.043            | 0.306            |
|                                           | IOR vs NOR                               | 2.4           | [0.43, 9.61]        | 0.286            | 0.535        | 1.09               | [0.72, 1.67]        | 0.673            | 0.845            |
|                                           | IOR vs NIOR                              | 1.57          | [0.28, 6.42]        | 0.573            | 0.599        | 0.87               | [0.56, 1.35]        | 0.539            | 0.789            |
|                                           | Age (>55 vs 18-55)                       | 0.68          | [0.25, 1.62]        | 0.395            | 0.535        | 1.07               | [0.86, 1.33]        | 0.541            | 0.789            |
|                                           | Sex at Birth (Male vs Female)            | 1.26          | [0.58, 2.7]         | 0.557            | 0.599        | 1                  | [0.82, 1.22]        | 0.969            | 0.969            |
|                                           | BMI ( $\geq 30$ vs $< 30$ )              | 0.5           | [0.22, 1.11]        | 0.091            | 0.298        | 1.02               | [0.83, 1.25]        | 0.836            | 0.915            |
|                                           | COPD/Emphysema/Asthma                    | 1.33          | [0.39, 3.78]        | 0.624            | 0.624        | 1.1                | [0.8, 1.52]         | 0.549            | 0.789            |
|                                           | Diabetes                                 | 0.42          | [0.08, 1.4]         | 0.172            | 0.361        | 1.08               | [0.81, 1.43]        | 0.622            | 0.841            |
|                                           | Hypertension                             | 0.33          | [0.08, 0.98]        | 0.045            | 0.287        | 1.11               | [0.86, 1.42]        | 0.428            | 0.757            |
|                                           | HIV/AIDS                                 | 0.58          | [0.15, 1.67]        | 0.334            | 0.535        | 0.95               | [0.72, 1.26]        | 0.73             | 0.845            |
|                                           | Prolonged Viral Shedding                 | 3.36          | [1.02, 9.88]        | 0.046            | 0.287        | 1.39               | [0.97, 2]           | 0.071            | 0.306            |
|                                           | Current Cigarettes/Marijuana Smoker      | 2.89          | [1, 7.84]           | 0.05             | 0.287        | 1.19               | [0.84, 1.68]        | 0.33             | 0.691            |
|                                           | Ever Cigarettes/Marijuana Smoker         | 2.16          | [0.93, 5.05]        | 0.072            | 0.298        | 1.24               | [1, 1.55]           | 0.055            | 0.306            |
|                                           | Non-Hispanic Black vs Non-Hispanic White | 0.32          | [0.07, 1.3]         | 0.112            | 0.298        | 1.07               | [0.72, 1.59]        | 0.734            | 0.845            |
|                                           | Others vs Non-His White                  | 0.65          | [0.16, 2.43]        | 0.533            | 0.599        | 1.25               | [0.85, 1.85]        | 0.256            | 0.59             |
|                                           | Region (Overall Test)                    | -             | -                   | 0.117            | 0.298        | -                  | -                   | 0.033            | 0.306            |
| USA vs Peru                               | 2.49                                     | [0.81, 8.83]  | 0.113               | 0.298            | <b>1.47</b>  | <b>[1.13, 1.9]</b> | <b>0.004</b>        | <b>0.087</b>     |                  |
| Non-RSA vs RSA                            | 0.44                                     | [0.11, 1.34]  | 0.154               | 0.355            | 1.02         | [0.75, 1.38]       | 0.898               | 0.939            |                  |
| RSA vs Peru                               | 3.73                                     | [1.28, 13.17] | 0.015               | 0.287            | 1.26         | [0.97, 1.63]       | 0.08                | 0.306            |                  |
| Non-RSA vs Peru                           | 1.63                                     | [0.35, 7.03]  | 0.517               | 0.599            | 1.29         | [0.94, 1.75]       | 0.115               | 0.362            |                  |
| RSA vs USA                                | 1.5                                      | [0.63, 3.78]  | 0.367               | 0.535            | 0.86         | [0.66, 1.11]       | 0.241               | 0.59             |                  |
| Non-RSA vs USA                            | 0.65                                     | [0.16, 2.18]  | 0.503               | 0.599            | 0.88         | [0.64, 1.2]        | 0.402               | 0.757            |                  |
| Respiratory                               | COVID-19 Severity (Overall Test)         | -             | -                   | <b>0.03</b>      | <b>0.113</b> | -                  | -                   | <b>&lt;0.001</b> | <b>&lt;0.001</b> |

|      |                                          |             |                     |              |              |             |                     |                  |                  |
|------|------------------------------------------|-------------|---------------------|--------------|--------------|-------------|---------------------|------------------|------------------|
|      | NIOR vs NOR                              | <b>1.74</b> | <b>[1.15, 2.64]</b> | <b>0.009</b> | <b>0.04</b>  | <b>1.6</b>  | <b>[1.35, 1.9]</b>  | <b>&lt;0.001</b> | <b>&lt;0.001</b> |
|      | IOR vs NOR                               | 1.52        | [0.7, 3.14]         | 0.279        | 0.559        | <b>1.58</b> | <b>[1.17, 2.13]</b> | <b>0.003</b>     | <b>0.013</b>     |
|      | IOR vs NIOR                              | 0.87        | [0.4, 1.83]         | 0.719        | 0.889        | 0.99        | [0.72, 1.34]        | 0.933            | 0.962            |
|      | Age (>55 vs 18-55)                       | 0.95        | [0.61, 1.45]        | 0.806        | 0.889        | 1.04        | [0.88, 1.24]        | 0.643            | 0.846            |
|      | Sex at Birth (Male vs Female)            | 1.05        | [0.7, 1.57]         | 0.812        | 0.889        | 0.97        | [0.82, 1.14]        | 0.699            | 0.846            |
|      | BMI ( $\geq 30$ vs <30)                  | 1.37        | [0.92, 2.06]        | 0.124        | 0.357        | <b>1.19</b> | <b>[1.01, 1.4]</b>  | <b>0.036</b>     | <b>0.076</b>     |
|      | COPD/Emphysema/Asthma                    | 1.54        | [0.8, 2.89]         | 0.193        | 0.463        | <b>1.45</b> | <b>[1.1, 1.9]</b>   | <b>0.008</b>     | <b>0.025</b>     |
|      | Diabetes                                 | 0.82        | [0.46, 1.41]        | 0.468        | 0.769        | 1.16        | [0.93, 1.46]        | 0.189            | 0.335            |
|      | Hypertension                             | 0.9         | [0.56, 1.42]        | 0.639        | 0.865        | 0.89        | [0.73, 1.07]        | 0.215            | 0.353            |
|      | HIV/AIDS                                 | 0.68        | [0.36, 1.23]        | 0.201        | 0.463        | 1.02        | [0.8, 1.3]          | 0.88             | 0.962            |
|      | Prolonged Viral Shedding                 | 1.55        | [0.68, 3.4]         | 0.292        | 0.559        | 1.04        | [0.74, 1.47]        | 0.806            | 0.927            |
|      | Current Cigarettes/Marijuana Smoker      | 0.97        | [0.46, 1.96]        | 0.943        | 0.946        | 1.13        | [0.84, 1.53]        | 0.409            | 0.627            |
|      | Ever Cigarettes/Marijuana Smoker         | 1.02        | [0.63, 1.62]        | 0.946        | 0.946        | 0.96        | [0.8, 1.16]         | 0.669            | 0.846            |
|      | Non-Hispanic Black vs Non-Hispanic White | <b>0.36</b> | <b>[0.17, 0.76]</b> | <b>0.007</b> | <b>0.04</b>  | <b>0.67</b> | <b>[0.49, 0.92]</b> | <b>0.013</b>     | <b>0.034</b>     |
|      | Others vs Non-His White                  | 0.8         | [0.37, 1.69]        | 0.561        | 0.817        | 0.77        | [0.56, 1.06]        | 0.107            | 0.205            |
|      | Region (Overall Test)                    | -           | -                   | <b>0.007</b> | <b>0.04</b>  | -           | -                   | <b>0.001</b>     | <b>0.003</b>     |
|      | USA vs Peru                              | <b>2.65</b> | <b>[1.51, 4.76]</b> | <b>0.001</b> | <b>0.014</b> | <b>1.34</b> | <b>[1.08, 1.67]</b> | <b>0.009</b>     | <b>0.025</b>     |
|      | Non-RSA vs RSA                           | 0.9         | [0.48, 1.66]        | 0.736        | 0.889        | <b>1.45</b> | <b>[1.12, 1.88]</b> | <b>0.005</b>     | <b>0.018</b>     |
|      | RSA vs Peru                              | <b>2.31</b> | <b>[1.32, 4.12]</b> | <b>0.003</b> | <b>0.035</b> | 0.93        | [0.75, 1.15]        | 0.493            | 0.709            |
|      | Non-RSA vs Peru                          | <b>2.07</b> | <b>[1.02, 4.2]</b>  | <b>0.044</b> | <b>0.146</b> | <b>1.35</b> | <b>[1.03, 1.78]</b> | <b>0.033</b>     | <b>0.076</b>     |
|      | RSA vs USA                               | 0.87        | [0.54, 1.41]        | 0.569        | 0.817        | <b>0.69</b> | <b>[0.56, 0.85]</b> | <b>&lt;0.001</b> | <b>0.003</b>     |
|      | Non-RSA vs USA                           | 0.78        | [0.4, 1.48]         | 0.452        | 0.769        | 1.01        | [0.77, 1.32]        | 0.962            | 0.962            |
| Skin | COVID-19 Severity (Overall Test)         | -           | -                   | 0.303        | 0.889        | -           | -                   | -                | -                |
|      | NIOR vs NOR                              | 5.47        | [0.85, 63.19]       | 0.074        | 0.855        | -           | -                   | -                | -                |
|      | IOR vs NOR                               | 2.06        | [0.14, 28.09]       | 0.578        | 0.889        | -           | -                   | -                | -                |
|      | IOR vs NIOR                              | 0.38        | [0.02, 4.81]        | 0.459        | 0.889        | -           | -                   | -                | -                |
|      | Age (>55 vs 18-55)                       | 0.61        | [0.09, 3.42]        | 0.574        | 0.889        | -           | -                   | -                | -                |
|      | Sex at Birth (Male vs Female)            | 0.19        | [0.02, 1.08]        | 0.061        | 0.855        | -           | -                   | -                | -                |
|      | BMI ( $\geq 30$ vs <30)                  | 1.91        | [0.45, 9.05]        | 0.38         | 0.889        | -           | -                   | -                | -                |
|      | COPD/Emphysema/Asthma                    | 0.53        | [0.06, 3.48]        | 0.515        | 0.889        | -           | -                   | -                | -                |
|      | Diabetes                                 | 1.65        | [0.18, 13.52]       | 0.639        | 0.889        | -           | -                   | -                | -                |
|      | Hypertension                             | 2.86        | [0.54, 21.76]       | 0.224        | 0.889        | -           | -                   | -                | -                |
|      | HIV/AIDS                                 | 0.94        | [0.08, 7.33]        | 0.951        | 0.951        | -           | -                   | -                | -                |
|      | Prolonged Viral Shedding                 | 2.41        | [0.35, 21.79]       | 0.369        | 0.889        | -           | -                   | -                | -                |
|      | Current Cigarettes/Marijuana Smoker      | 0.65        | [0.05, 5.83]        | 0.699        | 0.889        | -           | -                   | -                | -                |

|                                          |      |                |       |       |   |   |   |   |
|------------------------------------------|------|----------------|-------|-------|---|---|---|---|
| Ever Cigarettes/Marijuana Smoker         | 0.93 | [0.17, 5.01]   | 0.936 | 0.951 | - | - | - | - |
| Non-Hispanic Black vs Non-Hispanic White | 0.32 | [0.01, 5.09]   | 0.432 | 0.889 | - | - | - | - |
| Others vs Non-His White                  | 0.64 | [0.07, 4.41]   | 0.655 | 0.889 | - | - | - | - |
| Region (Overall Test)                    | -    | -              | 0.672 | 0.889 | - | - | - | - |
| USA vs Peru                              | 4.19 | [0.26, 631.39] | 0.339 | 0.889 | - | - | - | - |
| Non-RSA vs RSA                           | 1.13 | [0.09, 12.94]  | 0.922 | 0.951 | - | - | - | - |
| RSA vs Peru                              | 1.57 | [0.07, 260.57] | 0.793 | 0.912 | - | - | - | - |
| Non-RSA vs Peru                          | 1.77 | [0.08, 284.56] | 0.734 | 0.889 | - | - | - | - |
| RSA vs USA                               | 0.37 | [0.05, 2.46]   | 0.309 | 0.889 | - | - | - | - |
| Non-RSA vs USA                           | 0.42 | [0.04, 2.6]    | 0.366 | 0.889 | - | - | - | - |

†: Adjusted for a set of confounders (COVID-19 severity, age, sex assigned at birth, and region). For each of COVID-19 severity, age, sex assigned at birth, and region, the comparison was adjusted for the rest of confounders. Overall test for COVID-19 severity and region was done using Wald-test.

\*: Adjusted for multiple comparisons to control false discovery rate for each body system.

Bolded values for significant with p-value $\leq$ 0.05 and q-value $\leq$ 0.2.

NOR: symptomatic, no oxygen requirement; NIOR: symptomatic, non-invasive oxygen requirement; IOR: symptomatic, invasive oxygen requirement

**Supplemental Table 6. Use of concomitant medications.**

| Medications category  | Sub category                   |             | Total<br>(n=759) | Peru<br>(n=191) | USA<br>(n=197) | RSA (n=286) | Non-RSA<br>(n=85) | p-value |
|-----------------------|--------------------------------|-------------|------------------|-----------------|----------------|-------------|-------------------|---------|
| Any                   | Any                            | N           | 303 (39.9%)      | 32 (16.8%)      | 96 (48.7%)     | 161 (56.3%) | 14 (16.5%)        | <0.001  |
|                       |                                | Y           | 456 (60.1%)      | 159 (83.2%)     | 101 (51.3%)    | 125 (43.7%) | 71 (83.5%)        |         |
| Anticoagulants        | Any                            | N           | 693 (91.3%)      | 156 (81.7%)     | 190 (96.4%)    | 276 (96.5%) | 71 (83.5%)        | <0.001  |
|                       |                                | Y           | 66 (8.7%)        | 35 (18.3%)      | 7 (3.6%)       | 10 (3.5%)   | 14 (16.5%)        |         |
|                       | Enoxaparin                     | N           | 697 (91.8%)      | 157 (82.2%)     | 191 (97%)      | 277 (96.9%) | 72 (84.7%)        | <0.001  |
|                       |                                | Y           | 62 (8.2%)        | 34 (17.8%)      | 6 (3%)         | 9 (3.1%)    | 13 (15.3%)        |         |
| Anti-infectives       | Other anticoagulants           | N           | 751 (98.9%)      | 189 (99%)       | 195 (99%)      | 284 (99.3%) | 83 (97.6%)        | 0.787   |
|                       |                                | Y           | 8 (1.1%)         | 2 (1%)          | 2 (1%)         | 2 (0.7%)    | 2 (2.4%)          |         |
|                       | Any                            | N           | 471 (62.1%)      | 50 (26.2%)      | 144 (73.1%)    | 241 (84.3%) | 36 (42.4%)        | <0.001  |
|                       |                                | Y           | 288 (37.9%)      | 141 (73.8%)     | 53 (26.9%)     | 45 (15.7%)  | 49 (57.6%)        |         |
| Antifungals           | Azithromycin                   | N           | 755 (99.5%)      | 188 (98.4%)     | 197 (100%)     | 285 (99.7%) | 85 (100%)         | 0.228   |
|                       |                                | Y           | 4 (0.5%)         | 3 (1.6%)        | -              | 1 (0.3%)    | -                 |         |
|                       | Chloroquine/hydroxychloroquine | N           | 544 (71.7%)      | 68 (35.6%)      | 163 (82.7%)    | 265 (92.7%) | 48 (56.5%)        | <0.001  |
|                       |                                | Y           | 215 (28.3%)      | 123 (64.4%)     | 34 (17.3%)     | 21 (7.3%)   | 37 (43.5%)        |         |
| Ivermectin            | N                              | 637 (83.9%) | 115 (60.2%)      | 168 (85.3%)     | 280 (97.9%)    | 74 (87.1%)  | <0.001            |         |
|                       | Y                              | 122 (16.1%) | 76 (39.8%)       | 29 (14.7%)      | 6 (2.1%)       | 11 (12.9%)  |                   |         |
| Oral antiseptics      | N                              | 699 (92.1%) | 131 (68.6%)      | 197 (100%)      | 286 (100%)     | 85 (100%)   | <0.001            |         |
|                       | Y                              | 60 (7.9%)   | 60 (31.4%)       | -               | -              | -           |                   |         |
| Other antibiotics     | N                              | 754 (99.3%) | 191 (100%)       | 197 (100%)      | 281 (98.3%)    | 85 (100%)   | 0.080             |         |
|                       | Y                              | 5 (0.7%)    | -                | -               | 5 (1.7%)       | -           |                   |         |
| Other antivirals      | Remdesivir                     | N           | 655 (86.3%)      | 153 (80.1%)     | 182 (92.4%)    | 264 (92.3%) | 56 (65.9%)        | <0.001  |
|                       |                                | Y           | 104 (13.7%)      | 38 (19.9%)      | 15 (7.6%)      | 22 (7.7%)   | 29 (34.1%)        |         |
|                       | Other antivirals               | N           | 756 (99.6%)      | 191 (100%)      | 195 (99%)      | 285 (99.7%) | 85 (100%)         | 0.552   |
|                       |                                | Y           | 3 (0.4%)         | -               | 2 (1%)         | 1 (0.3%)    | -                 |         |
| Covid-19 vaccines     | Any                            | N           | 749 (98.7%)      | 191 (100%)      | 190 (96.4%)    | 284 (99.3%) | 84 (98.8%)        | 0.027   |
|                       |                                | Y           | 10 (1.3%)        | -               | 7 (3.6%)       | 2 (0.7%)    | 1 (1.2%)          |         |
|                       | Any                            | N           | 707 (93.1%)      | 183 (95.8%)     | 153 (77.7%)    | 286 (100%)  | 85 (100%)         | <0.001  |
|                       |                                | Y           | 52 (6.9%)        | 8 (4.2%)        | 44 (22.3%)     | -           | -                 |         |
| Immunomodulators      | Any                            | N           | 641 (84.5%)      | 131 (68.6%)     | 192 (97.5%)    | 250 (87.4%) | 68 (80%)          | <0.001  |
|                       |                                | Y           | 118 (15.5%)      | 60 (31.4%)      | 5 (2.5%)       | 36 (12.6%)  | 17 (20%)          |         |
|                       | Dexamethasone                  | N           | 720 (94.9%)      | 162 (84.8%)     | 197 (100%)     | 284 (99.3%) | 77 (90.6%)        | <0.001  |
|                       |                                | Y           | 39 (5.1%)        | 29 (15.2%)      | -              | 2 (0.7%)    | 8 (9.4%)          |         |
| Other corticosteroids | N                              | 670 (88.3%) | 149 (78%)        | 195 (99%)       | 251 (87.8%)    | 75 (88.2%)  | <0.001            |         |

|                                  |                                      |             |             |             |             |             |            |        |
|----------------------------------|--------------------------------------|-------------|-------------|-------------|-------------|-------------|------------|--------|
|                                  |                                      | Y           | 89 (11.7%)  | 42 (22%)    | 2 (1%)      | 35 (12.2%)  | 10 (11.8%) |        |
|                                  | Tocilizumab                          | N           | 749 (98.7%) | 184 (96.3%) | 194 (98.5%) | 286 (100%)  | 85 (100%)  | 0.011  |
| Symptomatic relief               | Any                                  | Y           | 10 (1.3%)   | 7 (3.7%)    | 3 (1.5%)    | -           | -          |        |
|                                  |                                      | N           | 517 (68.1%) | 114 (59.7%) | 154 (78.2%) | 210 (73.4%) | 39 (45.9%) | <0.001 |
|                                  | Antiacids/antiemetics/antidiarrheals | Y           | 242 (31.9%) | 77 (40.3%)  | 43 (21.8%)  | 76 (26.6%)  | 46 (54.1%) |        |
|                                  |                                      | N           | 734 (96.7%) | 176 (92.1%) | 193 (98%)   | 281 (98.3%) | 84 (98.8%) | 0.002  |
|                                  | Antihistamines/decongestants         | Y           | 25 (3.3%)   | 15 (7.9%)   | 4 (2%)      | 5 (1.7%)    | 1 (1.2%)   |        |
|                                  |                                      | N           | 729 (96%)   | 183 (95.8%) | 194 (98.5%) | 276 (96.5%) | 76 (89.4%) | 0.011  |
|                                  | Bronchodilators                      | Y           | 30 (4%)     | 8 (4.2%)    | 3 (1.5%)    | 10 (3.5%)   | 9 (10.6%)  |        |
|                                  |                                      | N           | 731 (96.3%) | 181 (94.8%) | 186 (94.4%) | 284 (99.3%) | 80 (94.1%) | 0.020  |
|                                  | Expectorants/antitussives            | Y           | 28 (3.7%)   | 10 (5.2%)   | 11 (5.6%)   | 2 (0.7%)    | 5 (5.9%)   |        |
|                                  |                                      | N           | 701 (92.4%) | 177 (92.7%) | 191 (97%)   | 256 (89.5%) | 77 (90.6%) | 0.048  |
|                                  | Fluids and electrolytes              | Y           | 58 (7.6%)   | 14 (7.3%)   | 6 (3%)      | 30 (10.5%)  | 8 (9.4%)   |        |
|                                  |                                      | N           | 749 (98.7%) | 189 (99%)   | 195 (99%)   | 286 (100%)  | 79 (92.9%) | <0.001 |
|                                  | Nsaids                               | Y           | 10 (1.3%)   | 2 (1%)      | 2 (1%)      | -           | 6 (7.1%)   |        |
|                                  |                                      | N           | 708 (93.3%) | 172 (90.1%) | 193 (98%)   | 269 (94.1%) | 74 (87.1%) | 0.004  |
|                                  | Opiods                               | Y           | 51 (6.7%)   | 19 (9.9%)   | 4 (2%)      | 17 (5.9%)   | 11 (12.9%) |        |
|                                  |                                      | N           | 756 (99.6%) | 191 (100%)  | 197 (100%)  | 283 (99%)   | 85 (100%)  | 0.289  |
|                                  | Other analgesics                     | Y           | 3 (0.4%)    | -           | -           | 3 (1%)      | -          |        |
|                                  |                                      | N           | 753 (99.2%) | 191 (100%)  | 197 (100%)  | 282 (98.6%) | 83 (97.6%) | 0.131  |
|                                  | Paracetamol                          | Y           | 6 (0.8%)    | -           | -           | 4 (1.4%)    | 2 (2.4%)   |        |
|                                  |                                      | N           | 574 (75.6%) | 130 (68.1%) | 157 (79.7%) | 241 (84.3%) | 46 (54.1%) | <0.001 |
| Vitamins/supplements/herbals     | Any                                  | Y           | 185 (24.4%) | 61 (31.9%)  | 40 (20.3%)  | 45 (15.7%)  | 39 (45.9%) |        |
|                                  |                                      | N           | 628 (82.7%) | 191 (100%)  | 194 (98.5%) | 218 (76.2%) | 25 (29.4%) | <0.001 |
| Ascorbic acid                    | Y                                    | 131 (17.3%) | -           | 3 (1.5%)    | 68 (23.8%)  | 60 (70.6%)  |            |        |
|                                  | N                                    | 700 (92.2%) | 191 (100%)  | 196 (99.5%) | 253 (88.5%) | 60 (70.6%)  | <0.001     |        |
| Herbals and natural preparations | Y                                    | 59 (7.8%)   | -           | 1 (0.5%)    | 33 (11.5%)  | 25 (29.4%)  |            |        |
|                                  | N                                    | 690 (90.9%) | 191 (100%)  | 195 (99%)   | 264 (92.3%) | 40 (47.1%)  | <0.001     |        |
| Other vitamins/supplements       | Y                                    | 69 (9.1%)   | -           | 2 (1%)      | 22 (7.7%)   | 45 (52.9%)  |            |        |
|                                  | N                                    | 726 (95.7%) | 191 (100%)  | 197 (100%)  | 259 (90.6%) | 79 (92.9%)  | <0.001     |        |
| Zinc                             | Y                                    | 33 (4.3%)   | -           | -           | 27 (9.4%)   | 6 (7.1%)    |            |        |
|                                  | N                                    | 727 (95.8%) | 191 (100%)  | 196 (99.5%) | 274 (95.8%) | 66 (77.6%)  | <0.001     |        |
| Other drugs                      | Any                                  | Y           | 32 (4.2%)   | -           | 1 (0.5%)    | 12 (4.2%)   | 19 (22.4%) |        |
|                                  |                                      | N           | 712 (93.8%) | 178 (93.2%) | 186 (94.4%) | 273 (95.5%) | 75 (88.2%) | 0.190  |
|                                  |                                      | Y           | 47 (6.2%)   | 13 (6.8%)   | 11 (5.6%)   | 13 (4.5%)   | 10 (11.8%) |        |

**Supplemental Table 7. Association of concomitant medications (Yes/No) with symptom duration after adjusting for COVID-19 severity, age, sex assigned at birth, and region.**

| <b>Body System</b>                 | <b>Comparison</b> | <b>Sample Size</b> | <b>GMR</b>  | <b>95% CI</b>       | <b>P-Value</b>   | <b>Q-Value*</b>  |
|------------------------------------|-------------------|--------------------|-------------|---------------------|------------------|------------------|
| <b>Any Concomitant medications</b> |                   |                    |             |                     |                  |                  |
| Any                                | Yes vs. No        | 410 vs. 167        | <b>1.33</b> | <b>[1.14, 1.56]</b> | <b>&lt;0.001</b> | <b>0.003</b>     |
| General                            | Yes vs. No        | 380 vs. 146        | <b>1.28</b> | <b>[1.08, 1.52]</b> | <b>0.005</b>     | <b>0.016</b>     |
| GIT                                | Yes vs. No        | 287 vs. 109        | <b>1.27</b> | <b>[1.03, 1.57]</b> | <b>0.024</b>     | <b>0.033</b>     |
| CNS                                | Yes vs. No        | 359 vs. 136        | <b>1.25</b> | <b>[1.04, 1.51]</b> | <b>0.019</b>     | <b>0.033</b>     |
| HEENT                              | Yes vs. No        | 268 vs. 78         | 1.2         | [0.94, 1.52]        | 0.139            | 0.162            |
| Respiratory                        | Yes vs. No        | 368 vs. 142        | <b>1.26</b> | <b>[1.06, 1.52]</b> | <b>0.011</b>     | <b>0.026</b>     |
| Skin                               | Yes vs. No        | 30 vs. 8           | 1.12        | [0.42, 2.98]        | 0.821            | 0.821            |
| <b>Corticosteroids</b>             |                   |                    |             |                     |                  |                  |
| Any                                | Yes vs. No        | 86 vs. 491         | 1.24        | [1.02, 1.52]        | 0.035            | 0.211            |
| General                            | Yes vs. No        | 83 vs. 443         | 1.18        | [0.96, 1.46]        | 0.122            | 0.244            |
| GIT                                | Yes vs. No        | 54 vs. 342         | 1.17        | [0.89, 1.53]        | 0.268            | 0.322            |
| CNS                                | Yes vs. No        | 74 vs. 421         | 1.1         | [0.87, 1.39]        | 0.414            | 0.414            |
| HEENT                              | Yes vs. No        | 60 vs. 286         | 1.19        | [0.92, 1.55]        | 0.186            | 0.279            |
| Respiratory                        | Yes vs. No        | 83 vs. 427         | 1.22        | [0.97, 1.52]        | 0.085            | 0.244            |
| <b>Anticoagulants</b>              |                   |                    |             |                     |                  |                  |
| Any                                | Yes vs. No        | 65 vs. 512         | 1.12        | [0.89, 1.41]        | 0.343            | 0.8              |
| General                            | Yes vs. No        | 63 vs. 463         | 1.2         | [0.95, 1.53]        | 0.131            | 0.585            |
| GIT                                | Yes vs. No        | 49 vs. 347         | 0.97        | [0.73, 1.3]         | 0.85             | 0.921            |
| CNS                                | Yes vs. No        | 57 vs. 438         | 1.21        | [0.92, 1.59]        | 0.167            | 0.585            |
| HEENT                              | Yes vs. No        | 40 vs. 306         | 0.98        | [0.72, 1.35]        | 0.921            | 0.921            |
| Respiratory                        | Yes vs. No        | 63 vs. 447         | 1.1         | [0.85, 1.42]        | 0.469            | 0.821            |
| Skin                               | Yes vs. No        | 6 vs. 32           | 0.7         | [0.18, 2.82]        | 0.625            | 0.875            |
| <b>Anti-infectives</b>             |                   |                    |             |                     |                  |                  |
| Any                                | Yes vs. No        | 264 vs. 313        | <b>1.4</b>  | <b>[1.2, 1.63]</b>  | <b>&lt;0.001</b> | <b>&lt;0.001</b> |
| General                            | Yes vs. No        | 250 vs. 276        | <b>1.27</b> | <b>[1.07, 1.5]</b>  | <b>0.006</b>     | <b>0.009</b>     |
| GIT                                | Yes vs. No        | 190 vs. 206        | <b>1.47</b> | <b>[1.19, 1.8]</b>  | <b>&lt;0.001</b> | <b>0.001</b>     |
| CNS                                | Yes vs. No        | 229 vs. 266        | <b>1.43</b> | <b>[1.19, 1.72]</b> | <b>&lt;0.001</b> | <b>&lt;0.001</b> |
| HEENT                              | Yes vs. No        | 174 vs. 172        | <b>1.27</b> | <b>[1.03, 1.58]</b> | <b>0.027</b>     | <b>0.031</b>     |
| Respiratory                        | Yes vs. No        | 241 vs. 269        | <b>1.43</b> | <b>[1.2, 1.7]</b>   | <b>&lt;0.001</b> | <b>&lt;0.001</b> |
| Skin                               | Yes vs. No        | 18 vs. 20          | 0.96        | [0.39, 2.35]        | 0.934            | 0.934            |
| <b>Immunomodulators</b>            |                   |                    |             |                     |                  |                  |
| Any                                | Yes vs. No        | 115 vs. 462        | <b>1.3</b>  | <b>[1.08, 1.57]</b> | <b>0.006</b>     | <b>0.042</b>     |

|                                     |            |             |             |                     |              |              |
|-------------------------------------|------------|-------------|-------------|---------------------|--------------|--------------|
| General                             | Yes vs. No | 110 vs. 416 | 1.21        | [0.99, 1.47]        | 0.057        | 0.133        |
| GIT                                 | Yes vs. No | 72 vs. 324  | 1.16        | [0.9, 1.49]         | 0.258        | 0.301        |
| CNS                                 | Yes vs. No | 101 vs. 394 | 1.18        | [0.95, 1.46]        | 0.144        | 0.202        |
| HEENT                               | Yes vs. No | 79 vs. 267  | 1.25        | [0.98, 1.61]        | 0.078        | 0.136        |
| Respiratory                         | Yes vs. No | 112 vs. 398 | <b>1.28</b> | <b>[1.04, 1.57]</b> | <b>0.019</b> | <b>0.068</b> |
| Skin                                | Yes vs. No | 6 vs. 32    | 1.67        | [0.41, 6.76]        | 0.481        | 0.481        |
| <b>Other Drugs</b>                  |            |             |             |                     |              |              |
| Any                                 | Yes vs. No | 47 vs. 530  | 1.02        | [0.79, 1.32]        | 0.871        | 0.871        |
| General                             | Yes vs. No | 43 vs. 483  | 1.11        | [0.84, 1.46]        | 0.457        | 0.871        |
| GIT                                 | Yes vs. No | 40 vs. 356  | 0.84        | [0.62, 1.14]        | 0.272        | 0.871        |
| CNS                                 | Yes vs. No | 41 vs. 454  | 1.16        | [0.86, 1.57]        | 0.335        | 0.871        |
| HEENT                               | Yes vs. No | 28 vs. 318  | 1.04        | [0.72, 1.51]        | 0.822        | 0.871        |
| Respiratory                         | Yes vs. No | 44 vs. 466  | 0.95        | [0.71, 1.26]        | 0.707        | 0.871        |
| <b>Symptomatic Relief</b>           |            |             |             |                     |              |              |
| Any                                 | Yes vs. No | 237 vs. 340 | <b>1.26</b> | <b>[1.1, 1.46]</b>  | <b>0.001</b> | <b>0.006</b> |
| General                             | Yes vs. No | 222 vs. 304 | <b>1.27</b> | <b>[1.1, 1.48]</b>  | <b>0.002</b> | <b>0.006</b> |
| GIT                                 | Yes vs. No | 167 vs. 229 | <b>1.23</b> | <b>[1.02, 1.48]</b> | <b>0.029</b> | <b>0.05</b>  |
| CNS                                 | Yes vs. No | 213 vs. 282 | <b>1.19</b> | <b>[1.01, 1.41]</b> | <b>0.037</b> | <b>0.052</b> |
| HEENT                               | Yes vs. No | 159 vs. 187 | <b>1.35</b> | <b>[1.11, 1.64]</b> | <b>0.003</b> | <b>0.006</b> |
| Respiratory                         | Yes vs. No | 224 vs. 286 | 1.14        | [0.97, 1.34]        | 0.124        | 0.144        |
| Skin                                | Yes vs. No | 17 vs. 21   | 0.75        | [0.32, 1.73]        | 0.505        | 0.505        |
| <b>Vitamins/Supplements/Herbals</b> |            |             |             |                     |              |              |
| Any                                 | Yes vs. No | 114 vs. 463 | <b>1.38</b> | <b>[1.12, 1.69]</b> | <b>0.003</b> | <b>0.019</b> |
| General                             | Yes vs. No | 104 vs. 422 | 1.19        | [0.95, 1.49]        | 0.13         | 0.304        |
| GIT                                 | Yes vs. No | 82 vs. 314  | 1.2         | [0.91, 1.57]        | 0.199        | 0.349        |
| CNS                                 | Yes vs. No | 108 vs. 387 | 1.12        | [0.88, 1.42]        | 0.346        | 0.48         |
| HEENT                               | Yes vs. No | 74 vs. 272  | 1.13        | [0.85, 1.5]         | 0.412        | 0.48         |
| Respiratory                         | Yes vs. No | 101 vs. 409 | <b>1.36</b> | <b>[1.07, 1.72]</b> | <b>0.011</b> | <b>0.039</b> |
| Skin                                | Yes vs. No | 9 vs. 29    | 0.94        | [0.34, 2.59]        | 0.91         | 0.91         |

**Supplemental Table 8. Summary of persistence beyond acute COVID-19 resolution and symptom duration by region.**

| Body System                  | Symptom                         | Outcome            | Statistics   | Total       | Peru          | USA           | RSA            | Non-RSA       | p-value |
|------------------------------|---------------------------------|--------------------|--------------|-------------|---------------|---------------|----------------|---------------|---------|
| Any System                   | Any Symptom                     | Symptom            | N (%)        | 578 (100%)  | 150 (100%)    | 152 (100%)    | 209 (100%)     | 67 (100%)     | -       |
|                              |                                 | Persistence        | N (%)        | 251 (43%)   | 26 (17.3%)    | 98 (64.5%)    | 95 (45.5%)     | 32 (47.8%)    | <0.001  |
|                              |                                 | Duration (in Days) | Median (IQR) | 20 (11, 35) | 16 (10, 24)   | 30 (16, 46.5) | 17 (8, 30)     | 25 (14, 42.5) | <0.001  |
|                              |                                 | Duration Days >30  | N (%)        | 163 (28%)   | 23 (15.3%)    | 69 (45.4%)    | 47 (22.5%)     | 24 (35.8%)    | -       |
|                              |                                 | Duration Days >60  | N (%)        | 46 (8%)     | 2 (1.3%)      | 24 (15.8%)    | 12 (5.7%)      | 8 (11.9%)     | -       |
| Central Nervous System (CNS) | Any                             | Symptom            | N (%)        | 496 (86%)   | 123 (82%)     | 133 (87.5%)   | 178 (85.2%)    | 62 (92.5%)    | 0.195   |
|                              |                                 | Persistence        | N (%)        | 114 (23%)   | 1 (0.8%)      | 44 (33.1%)    | 54 (30.3%)     | 15 (24.2%)    | <0.001  |
|                              |                                 | Duration (in Days) | Median (IQR) | 11 (7, 21)  | 8 (5, 13.5)   | 14 (7, 30)    | 12 (7, 21)     | 14 (7, 30)    | <0.001  |
|                              |                                 | Duration Days >30  | N (%)        | 71 (14%)    | 2 (1.6%)      | 30 (22.6%)    | 24 (13.5%)     | 15 (24.2%)    | -       |
|                              |                                 | Duration Days >60  | N (%)        | 23 (5%)     | 0 (0%)        | 12 (9%)       | 7 (3.9%)       | 4 (6.5%)      | -       |
|                              | Altered mental status/confusion | Symptom            | N (%)        | 94 (16%)    | 8 (5.3%)      | 43 (28.3%)    | 24 (11.5%)     | 19 (28.4%)    | <0.001  |
|                              |                                 | Persistence        | N (%)        | 18 (19%)    | 0 (0%)        | 10 (23.3%)    | 5 (20.8%)      | 3 (15.8%)     | 0.467   |
|                              |                                 | Duration (in Days) | Median (IQR) | 7 (3, 14)   | 7.5 (2.8, 10) | 7 (4, 21)     | 10 (2.8, 17.2) | 3 (3, 7)      | 0.235   |
|                              |                                 | Duration Days >30  | N (%)        | 12 (13%)    | 0 (0%)        | 7 (16.3%)     | 3 (12.5%)      | 2 (10.5%)     | -       |
|                              |                                 | Duration Days >60  | N (%)        | 7 (7%)      | 0 (0%)        | 4 (9.3%)      | 3 (12.5%)      | 0 (0%)        | -       |
|                              | Anosmia/Hyposmia                | Symptom            | N (%)        | 314 (54%)   | 71 (47.3%)    | 87 (57.2%)    | 112 (53.6%)    | 44 (65.7%)    | 0.072   |
|                              |                                 | Persistence        | N (%)        | 49 (16%)    | 0 (0%)        | 24 (27.6%)    | 18 (16.1%)     | 7 (15.9%)     | <0.001  |
|                              |                                 | Duration (in Days) | Median (IQR) | 10 (6, 18)  | 7 (4, 10)     | 14 (7, 30)    | 10 (6, 15.2)   | 14 (7, 21.8)  | <0.001  |
|                              |                                 | Duration Days >30  | N (%)        | 33 (11%)    | 1 (1.4%)      | 17 (19.5%)    | 9 (8%)         | 6 (13.6%)     | -       |
|                              |                                 | Duration Days >60  | N (%)        | 7 (2%)      | 0 (0%)        | 5 (5.7%)      | 1 (0.9%)       | 1 (2.3%)      | -       |
|                              | Headache                        | Symptom            | N (%)        | 374 (65%)   | 87 (58%)      | 105 (69.1%)   | 134 (64.1%)    | 48 (71.6%)    | 0.129   |
|                              |                                 | Persistence        | N (%)        | 63 (17%)    | 1 (1.1%)      | 19 (18.1%)    | 36 (26.9%)     | 7 (14.6%)     | <0.001  |
|                              |                                 | Duration (in Days) | Median (IQR) | 8 (4, 14)   | 7 (4, 10)     | 10 (3, 14)    | 8 (4, 15)      | 7 (4, 21.2)   | 0.261   |
|                              |                                 | Duration Days >30  | N (%)        | 36 (10%)    | 1 (1.1%)      | 13 (12.4%)    | 13 (9.7%)      | 9 (18.8%)     | -       |
|                              |                                 | Duration Days >60  | N (%)        | 12 (3%)     | 0 (0%)        | 5 (4.8%)      | 4 (3%)         | 3 (6.2%)      | -       |
| Hypogeusia                   | Symptom                         | N (%)              | 351 (61%)    | 82 (54.7%)  | 90 (59.2%)    | 125 (59.8%)   | 54 (80.6%)     | 0.003         |         |
|                              | Persistence                     | N (%)              | 47 (13%)     | 0 (0%)      | 22 (24.4%)    | 18 (14.4%)    | 7 (13%)        | <0.001        |         |
|                              | Duration (in Days)              | Median (IQR)       | 10 (6, 17.2) | 7 (4, 10)   | 14 (7, 23.5)  | 10 (6, 15)    | 14 (7, 18.8)   | <0.001        |         |
|                              | Duration Days >30               | N (%)              | 27 (8%)      | 1 (1.2%)    | 15 (16.7%)    | 9 (7.2%)      | 2 (3.7%)       | -             |         |
|                              | Duration Days >60               | N (%)              | 4 (1%)       | 0 (0%)      | 3 (3.3%)      | 1 (0.8%)      | 0 (0%)         | -             |         |
| Gastrointestinal (GIT)       | Any                             | Symptom            | N (%)        | 397 (69%)   | 104 (69.3%)   | 119 (78.3%)   | 123 (58.9%)    | 51 (76.1%)    | <0.001  |
|                              |                                 | Persistence        | N (%)        | 46 (12%)    | 4 (3.8%)      | 23 (19.3%)    | 14 (11.4%)     | 5 (9.8%)      | 0.004   |
|                              |                                 | Duration (in Days) | Median (IQR) | 7.5 (4, 14) | 7 (5, 12)     | 10 (5, 19.8)  | 7 (4, 14)      | 7 (4, 12)     | 0.019   |
|                              |                                 | Duration Days >30  | N (%)        | 23 (6%)     | 3 (2.9%)      | 11 (9.2%)     | 4 (3.3%)       | 5 (9.8%)      | -       |
|                              |                                 | Duration Days >60  | N (%)        | 6 (2%)      | 1 (1%)        | 5 (4.2%)      | 0 (0%)         | 0 (0%)        | -       |
|                              | Abdominal pain                  | Symptom            | N (%)        | 99 (17%)    | 27 (18%)      | 25 (16.4%)    | 30 (14.4%)     | 17 (25.4%)    | 0.215   |
|                              |                                 | Persistence        | N (%)        | 10 (10%)    | 2 (7.4%)      | 5 (20%)       | 3 (10%)        | 0 (0%)        | 0.185   |
|                              |                                 | Duration (in Days) | Median (IQR) | 5 (3, 10.5) | 5 (3, 7)      | 7 (3, 14)     | 7 (3, 14)      | 5 (3, 7)      | 0.330   |
|                              |                                 | Duration Days >30  | N (%)        | 3 (3%)      | 1 (3.7%)      | 2 (8%)        | 0 (0%)         | 0 (0%)        | -       |



|                 |                            |                    |              |              |              |               |               |              |        |
|-----------------|----------------------------|--------------------|--------------|--------------|--------------|---------------|---------------|--------------|--------|
|                 |                            | Duration Days >60  | N (%)        | 2 (2%)       | 0 (0%)       | 2 (8%)        | 0 (0%)        | 0 (0%)       | -      |
| Anorexia        |                            | Symptom            | N (%)        | 270 (47%)    | 67 (44.7%)   | 86 (56.6%)    | 80 (38.3%)    | 37 (55.2%)   | 0.003  |
|                 |                            | Persistence        | N (%)        | 16 (6%)      | 2 (3%)       | 6 (7%)        | 4 (5%)        | 4 (10.8%)    | 0.405  |
|                 |                            | Duration (in Days) | Median (IQR) | 10 (6, 14)   | 8 (5, 12)    | 10 (7, 17)    | 8 (5, 14)     | 9 (7, 14)    | 0.118  |
|                 |                            | Duration Days >30  | N (%)        | 16 (6%)      | 2 (3%)       | 6 (7%)        | 3 (3.8%)      | 5 (13.5%)    | -      |
|                 |                            | Duration Days >60  | N (%)        | 2 (1%)       | 1 (1.5%)     | 1 (1.2%)      | 0 (0%)        | 0 (0%)       | -      |
| Diarrhea        |                            | Symptom            | N (%)        | 229 (40%)    | 73 (48.7%)   | 85 (55.9%)    | 45 (21.5%)    | 26 (38.8%)   | <0.001 |
|                 |                            | Persistence        | N (%)        | 20 (9%)      | 0 (0%)       | 14 (16.5%)    | 5 (11.1%)     | 1 (3.8%)     | 0.002  |
|                 |                            | Duration (in Days) | Median (IQR) | 5 (2, 8)     | 4 (3, 7)     | 6 (3, 14)     | 4 (2, 7)      | 3 (2, 7)     | 0.034  |
|                 |                            | Duration Days >30  | N (%)        | 6 (3%)       | 0 (0%)       | 6 (7.1%)      | 0 (0%)        | 0 (0%)       | -      |
|                 |                            | Duration Days >60  | N (%)        | 3 (1%)       | 0 (0%)       | 3 (3.5%)      | 0 (0%)        | 0 (0%)       | -      |
| Nausea/Vomiting |                            | Symptom            | N (%)        | 161 (28%)    | 37 (24.7%)   | 46 (30.3%)    | 51 (24.4%)    | 27 (40.3%)   | 0.055  |
|                 |                            | Persistence        | N (%)        | 10 (6%)      | 0 (0%)       | 5 (10.9%)     | 4 (7.8%)      | 1 (3.7%)     | 0.196  |
|                 |                            | Duration (in Days) | Median (IQR) | 5 (2, 9)     | 3 (2, 7)     | 6.5 (2.2, 13) | 5 (2.5, 7.5)  | 3 (1.5, 7)   | 0.242  |
|                 |                            | Duration Days >30  | N (%)        | 4 (2%)       | 0 (0%)       | 2 (4.3%)      | 2 (3.9%)      | 0 (0%)       | -      |
|                 |                            | Duration Days >60  | N (%)        | 0 (0%)       | 0 (0%)       | 0 (0%)        | 0 (0%)        | 0 (0%)       | -      |
| General         | Any                        | Symptom            | N (%)        | 529 (92%)    | 138 (92%)    | 147 (96.7%)   | 181 (86.6%)   | 63 (94%)     | 0.006  |
|                 |                            | Persistence        | N (%)        | 141 (27%)    | 5 (3.6%)     | 63 (42.9%)    | 56 (30.9%)    | 17 (27%)     | <0.001 |
|                 |                            | Duration (in Days) | Median (IQR) | 14 (7, 25.8) | 10 (6.2, 15) | 21 (13, 35)   | 14 (7, 26.2)  | 14 (7, 27.5) | <0.001 |
|                 |                            | Duration Days >30  | N (%)        | 89 (17%)     | 7 (5.1%)     | 42 (28.6%)    | 29 (16.2%)    | 11 (17.5%)   | -      |
|                 |                            | Duration Days >60  | N (%)        | 21 (4%)      | 1 (0.7%)     | 14 (9.5%)     | 5 (2.8%)      | 1 (1.6%)     | -      |
|                 | Chills                     | Symptom            | N (%)        | 296 (51%)    | 62 (41.3%)   | 95 (62.5%)    | 101 (48.3%)   | 38 (56.7%)   | 0.002  |
|                 |                            | Persistence        | N (%)        | 11 (4%)      | 0 (0%)       | 4 (4.2%)      | 6 (5.9%)      | 1 (2.6%)     | 0.264  |
|                 |                            | Duration (in Days) | Median (IQR) | 6 (3, 10)    | 4 (2, 5.8)   | 7 (3, 10)     | 7 (4, 14)     | 7 (3, 10)    | <0.001 |
|                 |                            | Duration Days >30  | N (%)        | 10 (3%)      | 0 (0%)       | 3 (3.2%)      | 5 (5%)        | 2 (5.3%)     | -      |
|                 |                            | Duration Days >60  | N (%)        | 3 (1%)       | 0 (0%)       | 1 (1.1%)      | 2 (2%)        | 0 (0%)       | -      |
|                 | Fever                      | Symptom            | N (%)        | 344 (60%)    | 106 (70.7%)  | 113 (74.3%)   | 95 (45.5%)    | 30 (44.8%)   | <0.001 |
|                 |                            | Persistence        | N (%)        | 0 (0%)       | 0 (0%)       | 0 (0%)        | 0 (0%)        | 0 (0%)       | -      |
|                 |                            | Duration (in Days) | Median (IQR) | 6 (3, 10)    | 5 (3, 8)     | 7 (4, 14)     | 5 (3, 9.5)    | 7 (3, 14)    | 0.003  |
|                 |                            | Duration Days >30  | N (%)        | 4 (1%)       | 0 (0%)       | 2 (1.8%)      | 2 (2.1%)      | 0 (0%)       | -      |
|                 |                            | Duration Days >60  | N (%)        | 0 (0%)       | 0 (0%)       | 0 (0%)        | 0 (0%)        | 0 (0%)       | -      |
|                 | Myalgia                    | Symptom            | N (%)        | 333 (58%)    | 75 (50%)     | 105 (69.1%)   | 111 (53.1%)   | 42 (62.7%)   | 0.003  |
|                 |                            | Persistence        | N (%)        | 49 (15%)     | 4 (5.3%)     | 12 (11.4%)    | 26 (23.4%)    | 7 (16.7%)    | 0.005  |
|                 |                            | Duration (in Days) | Median (IQR) | 10 (5, 18.8) | 7 (5, 15)    | 10 (4, 15)    | 12 (7, 25)    | 7 (5, 16.8)  | 0.014  |
|                 |                            | Duration Days >30  | N (%)        | 32 (10%)     | 3 (4%)       | 9 (8.6%)      | 16 (14.4%)    | 4 (9.5%)     | -      |
|                 |                            | Duration Days >60  | N (%)        | 7 (2%)       | 1 (1.3%)     | 1 (1%)        | 4 (3.6%)      | 1 (2.4%)     | -      |
|                 | New or increased Fatigue   | Symptom            | N (%)        | 450 (78%)    | 95 (63.3%)   | 140 (92.1%)   | 160 (76.6%)   | 55 (82.1%)   | <0.001 |
|                 |                            | Persistence        | N (%)        | 119 (26%)    | 3 (3.2%)     | 55 (39.3%)    | 48 (30%)      | 13 (23.6%)   | <0.001 |
|                 |                            | Duration (in Days) | Median (IQR) | 14 (7, 28)   | 11 (7, 15.5) | 21 (12, 35)   | 14 (7, 25.5)  | 14 (7, 28)   | <0.001 |
|                 |                            | Duration Days >30  | N (%)        | 83 (18%)     | 6 (6.3%)     | 40 (28.6%)    | 26 (16.2%)    | 11 (20%)     | -      |
|                 |                            | Duration Days >60  | N (%)        | 19 (4%)      | 1 (1.1%)     | 13 (9.3%)     | 4 (2.5%)      | 1 (1.8%)     | -      |
|                 | Unable to sleep lying down | Symptom            | N (%)        | 164 (28%)    | 37 (24.7%)   | 47 (30.9%)    | 54 (25.8%)    | 26 (38.8%)   | 0.124  |
|                 |                            | Persistence        | N (%)        | 16 (10%)     | 0 (0%)       | 7 (14.9%)     | 6 (11.1%)     | 3 (11.5%)    | 0.132  |
|                 |                            | Duration (in Days) | Median (IQR) | 10 (5, 15)   | 7 (4, 14)    | 10 (5, 15.5)  | 8.5 (6, 14.8) | 10 (7, 14)   | 0.424  |

|                                                 |                                |                    |              |             |             |                 |              |               |        |
|-------------------------------------------------|--------------------------------|--------------------|--------------|-------------|-------------|-----------------|--------------|---------------|--------|
|                                                 |                                | Duration Days >30  | N (%)        | 8 (5%)      | 1 (2.7%)    | 4 (8.5%)        | 1 (1.9%)     | 2 (7.7%)      | -      |
|                                                 |                                | Duration Days >60  | N (%)        | 2 (1%)      | 0 (0%)      | 1 (2.1%)        | 1 (1.9%)     | 0 (0%)        | -      |
| Head, Eyes, Ears,<br>Nose and Throat<br>(HEENT) | Any                            | Symptom            | N (%)        | 347 (60%)   | 97 (64.7%)  | 92 (60.5%)      | 109 (52.2%)  | 49 (73.1%)    | 0.009  |
|                                                 |                                | Persistence        | N (%)        | 31 (9%)     | 4 (4.1%)    | 9 (9.8%)        | 15 (13.8%)   | 3 (6.1%)      | 0.092  |
|                                                 |                                | Duration (in Days) | Median (IQR) | 7 (4, 14)   | 7 (4, 10)   | 10 (5, 15)      | 7 (4, 15)    | 7 (5, 14)     | 0.039  |
|                                                 |                                | Duration Days >30  | N (%)        | 22 (6%)     | 2 (2.1%)    | 9 (9.8%)        | 9 (8.3%)     | 2 (4.1%)      | -      |
|                                                 |                                | Duration Days >60  | N (%)        | 6 (2%)      | 1 (1%)      | 2 (2.2%)        | 2 (1.8%)     | 1 (2%)        | -      |
|                                                 | Nasal<br>congestion/Rhinorrhea | Symptom            | N (%)        | 250 (43%)   | 58 (38.7%)  | 76 (50%)        | 76 (36.4%)   | 40 (59.7%)    | 0.001  |
|                                                 |                                | Persistence        | N (%)        | 18 (7%)     | 1 (1.7%)    | 6 (7.9%)        | 9 (11.8%)    | 2 (5%)        | 0.145  |
|                                                 |                                | Duration (in Days) | Median (IQR) | 7 (4, 14)   | 4 (3, 10)   | 10 (5, 14)      | 7 (4, 14)    | 7 (4.8, 10.2) | <0.001 |
|                                                 |                                | Duration Days >30  | N (%)        | 14 (6%)     | 0 (0%)      | 8 (10.5%)       | 5 (6.6%)     | 1 (2.5%)      | -      |
|                                                 |                                | Duration Days >60  | N (%)        | 3 (1%)      | 0 (0%)      | 2 (2.6%)        | 1 (1.3%)     | 0 (0%)        | -      |
|                                                 | Sore throat                    | Symptom            | N (%)        | 255 (44%)   | 80 (53.3%)  | 59 (38.8%)      | 79 (37.8%)   | 37 (55.2%)    | 0.003  |
|                                                 |                                | Persistence        | N (%)        | 18 (7%)     | 3 (3.8%)    | 4 (6.8%)        | 9 (11.4%)    | 2 (5.4%)      | 0.289  |
|                                                 |                                | Duration (in Days) | Median (IQR) | 7 (4, 13.5) | 5 (3, 9.2)  | 5 (3, 14)       | 7 (4, 14)    | 7 (4, 10)     | 0.445  |
|                                                 |                                | Duration Days >30  | N (%)        | 14 (5%)     | 2 (2.5%)    | 6 (10.2%)       | 5 (6.3%)     | 1 (2.7%)      | -      |
|                                                 |                                | Duration Days >60  | N (%)        | 4 (2%)      | 1 (1.2%)    | 1 (1.7%)        | 1 (1.3%)     | 1 (2.7%)      | -      |
| Respiratory                                     | Any                            | Symptom            | N (%)        | 511 (88%)   | 132 (88%)   | 135 (88.8%)     | 182 (87.1%)  | 62 (92.5%)    | 0.677  |
|                                                 |                                | Persistence        | N (%)        | 151 (30%)   | 24 (18.2%)  | 49 (36.3%)      | 59 (32.4%)   | 19 (30.6%)    | 0.008  |
|                                                 |                                | Duration (in Days) | Median (IQR) | 15 (7, 29)  | 15 (7, 23)  | 20.5 (10, 34.5) | 12 (6, 22)   | 15 (10, 30)   | <0.001 |
|                                                 |                                | Duration Days >30  | N (%)        | 102 (20%)   | 21 (15.9%)  | 39 (28.9%)      | 27 (14.8%)   | 15 (24.2%)    | -      |
|                                                 |                                | Duration Days >60  | N (%)        | 27 (5%)     | 2 (1.5%)    | 14 (10.4%)      | 5 (2.7%)     | 6 (9.7%)      | -      |
|                                                 | Chest pain                     | Symptom            | N (%)        | 267 (46%)   | 64 (42.7%)  | 59 (38.8%)      | 96 (45.9%)   | 48 (71.6%)    | <0.001 |
|                                                 |                                | Persistence        | N (%)        | 50 (19%)    | 7 (10.9%)   | 8 (13.6%)       | 20 (20.8%)   | 15 (31.2%)    | 0.032  |
|                                                 |                                | Duration (in Days) | Median (IQR) | 10 (5, 20)  | 10 (5, 15)  | 10 (6, 15)      | 9 (5, 19)    | 13 (7, 30)    | 0.233  |
|                                                 |                                | Duration Days >30  | N (%)        | 33 (12%)    | 6 (9.4%)    | 8 (13.6%)       | 8 (8.3%)     | 11 (22.9%)    | -      |
|                                                 |                                | Duration Days >60  | N (%)        | 9 (3%)      | 0 (0%)      | 3 (5.1%)        | 2 (2.1%)     | 4 (8.3%)      | -      |
|                                                 | Cough                          | Symptom            | N (%)        | 385 (67%)   | 106 (70.7%) | 111 (73%)       | 119 (56.9%)  | 49 (73.1%)    | 0.003  |
|                                                 |                                | Persistence        | N (%)        | 74 (19%)    | 13 (12.3%)  | 30 (27%)        | 27 (22.7%)   | 4 (8.2%)      | 0.006  |
|                                                 |                                | Duration (in Days) | Median (IQR) | 13 (6, 21)  | 11 (6, 20)  | 16 (7, 28.5)    | 10 (5, 19.5) | 11 (6, 30)    | 0.031  |
|                                                 |                                | Duration Days >30  | N (%)        | 58 (15%)    | 11 (10.4%)  | 23 (20.7%)      | 17 (14.3%)   | 7 (14.3%)     | -      |
|                                                 |                                | Duration Days >60  | N (%)        | 12 (3%)     | 2 (1.9%)    | 5 (4.5%)        | 4 (3.4%)     | 1 (2%)        | -      |
|                                                 | Dyspnea at rest                | Symptom            | N (%)        | 237 (41%)   | 63 (42%)    | 68 (44.7%)      | 75 (35.9%)   | 31 (46.3%)    | 0.265  |
|                                                 |                                | Persistence        | N (%)        | 19 (8%)     | 1 (1.6%)    | 10 (14.7%)      | 7 (9.3%)     | 1 (3.2%)      | 0.032  |
|                                                 |                                | Duration (in Days) | Median (IQR) | 8 (4, 15)   | 7 (3, 11.5) | 11 (5, 19.2)    | 10 (5, 16)   | 7 (4.5, 16.5) | 0.022  |
|                                                 |                                | Duration Days >30  | N (%)        | 18 (8%)     | 1 (1.6%)    | 9 (13.2%)       | 6 (8%)       | 2 (6.5%)      | -      |
|                                                 |                                | Duration Days >60  | N (%)        | 4 (2%)      | 0 (0%)      | 2 (2.9%)        | 2 (2.7%)     | 0 (0%)        | -      |
|                                                 | Dyspnea with exertion          | Symptom            | N (%)        | 363 (63%)   | 102 (68%)   | 105 (69.1%)     | 119 (56.9%)  | 37 (55.2%)    | 0.029  |
|                                                 |                                | Persistence        | N (%)        | 72 (20%)    | 9 (8.8%)    | 29 (27.6%)      | 28 (23.5%)   | 6 (16.2%)     | 0.004  |
|                                                 |                                | Duration (in Days) | Median (IQR) | 11 (7, 21)  | 10 (6, 17)  | 15 (7, 30.2)    | 10 (6, 19.5) | 10 (7, 18)    | 0.046  |
|                                                 |                                | Duration Days >30  | N (%)        | 57 (16%)    | 11 (10.8%)  | 26 (24.8%)      | 15 (12.6%)   | 5 (13.5%)     | -      |

|      |                             |                    |              |                |              |                  |                 |                |        |
|------|-----------------------------|--------------------|--------------|----------------|--------------|------------------|-----------------|----------------|--------|
|      |                             | Duration Days >60  | N (%)        | 16 (4%)        | 0 (0%)       | 11 (10.5%)       | 3 (2.5%)        | 2 (5.4%)       | -      |
|      | Hemoptysis                  | Symptom            | N (%)        | 24 (4%)        | 3 (2%)       | 10 (6.6%)        | 8 (3.8%)        | 3 (4.5%)       | 0.254  |
|      |                             | Persistence        | N (%)        | 1 (4%)         | 0 (0%)       | 0 (0%)           | 1 (12.5%)       | 0 (0%)         | 0.555  |
|      |                             | Duration (in Days) | Median (IQR) | 4 (2, 7)       | 14 (7.5, 17) | 2.5 (2, 6.2)     | 4.5 (2.8, 7)    | 5 (4, 5.5)     | 0.714  |
|      |                             | Duration Days >30  | N (%)        | 0 (0%)         | 0 (0%)       | 0 (0%)           | 0 (0%)          | 0 (0%)         | -      |
|      |                             | Duration Days >60  | N (%)        | 0 (0%)         | 0 (0%)       | 0 (0%)           | 0 (0%)          | 0 (0%)         | -      |
|      | Increased sputum production | Symptom            | N (%)        | 161 (28%)      | 39 (26%)     | 48 (31.6%)       | 48 (23%)        | 26 (38.8%)     | 0.051  |
|      |                             | Persistence        | N (%)        | 17 (11%)       | 2 (5.1%)     | 3 (6.2%)         | 10 (20.8%)      | 2 (7.7%)       | 0.051  |
|      |                             | Duration (in Days) | Median (IQR) | 8 (4, 14)      | 7 (3.5, 13)  | 7 (4, 14)        | 9.5 (4.8, 17.5) | 10.5 (6.2, 14) | 0.248  |
|      |                             | Duration Days >30  | N (%)        | 13 (8%)        | 1 (2.6%)     | 4 (8.3%)         | 6 (12.5%)       | 2 (7.7%)       | -      |
|      |                             | Duration Days >60  | N (%)        | 3 (2%)         | 0 (0%)       | 0 (0%)           | 2 (4.2%)        | 1 (3.8%)       | -      |
| Skin | New Skin findings           | Symptom            | N (%)        | 39 (7%)        | 2 (1.3%)     | 20 (13.2%)       | 10 (4.8%)       | 7 (10.4%)      | <0.001 |
|      |                             | Persistence        | N (%)        | 12 (31%)       | 0 (0%)       | 8 (40%)          | 2 (20%)         | 2 (28.6%)      | 0.522  |
|      |                             | Duration (in Days) | Median (IQR) | 10.5 (6.2, 21) | 9 (8.5, 9.5) | 10.5 (5.8, 23.2) | 14 (5, 24)      | 14 (7, 17.5)   | 0.991  |
|      |                             | Duration Days >30  | N (%)        | 4 (10%)        | 0 (0%)       | 3 (15%)          | 1 (10%)         | 0 (0%)         | -      |
|      |                             | Duration Days >60  | N (%)        | 1 (3%)         | 0 (0%)       | 0 (0%)           | 1 (10%)         | 0 (0%)         | -      |

**Supplemental Table 9. Summary of persistence beyond acute COVID-19 resolution and symptom duration by COVID-19 severity.**

| Body System                  | Symptom                         | Outcome            | Statistics   | Total         | Symptomatic, no O2 requirement [NOR] | Symptomatic, non-invasive O2 requirement [NIOR] | Symptomatic, invasive O2 requirement [IOR] | p-value |
|------------------------------|---------------------------------|--------------------|--------------|---------------|--------------------------------------|-------------------------------------------------|--------------------------------------------|---------|
| Any System                   | Any Symptom                     | Symptom            | N (%)        | 578 (100%)    | 360 (100%)                           | 174 (100%)                                      | 44 (100%)                                  | -       |
|                              |                                 | Persistence        | N (%)        | 251 (43%)     | 144 (40%)                            | 88 (50.6%)                                      | 19 (43.2%)                                 | 0.069   |
|                              |                                 | Duration (in Days) | Median (IQR) | 20 (11, 35)   | 16 (8, 30)                           | 26 (15, 41)                                     | 24.5 (14.8, 36)                            | <0.001  |
|                              |                                 | Duration Days >30  | N (%)        | 163 (28%)     | 84 (23.3%)                           | 63 (36.2%)                                      | 16 (36.4%)                                 | -       |
|                              |                                 | Duration Days >60  | N (%)        | 46 (8%)       | 22 (6.1%)                            | 21 (12.1%)                                      | 3 (6.8%)                                   | -       |
| Central Nervous System (CNS) | Any                             | Symptom            | N (%)        | 496 (86%)     | 319 (88.6%)                          | 146 (83.9%)                                     | 31 (70.5%)                                 | 0.003   |
|                              |                                 | Persistence        | N (%)        | 114 (23%)     | 67 (21%)                             | 43 (29.5%)                                      | 4 (12.9%)                                  | 0.051   |
|                              |                                 | Duration (in Days) | Median (IQR) | 11 (7, 21)    | 10 (6, 19.8)                         | 14 (7.2, 25.8)                                  | 13 (9, 21)                                 | 0.004   |
|                              |                                 | Duration Days >30  | N (%)        | 71 (14%)      | 39 (12.2%)                           | 26 (17.8%)                                      | 6 (19.4%)                                  | -       |
|                              |                                 | Duration Days >60  | N (%)        | 23 (5%)       | 12 (3.8%)                            | 9 (6.2%)                                        | 2 (6.5%)                                   | -       |
|                              | Altered mental status/confusion | Symptom            | N (%)        | 94 (16%)      | 44 (12.2%)                           | 35 (20.1%)                                      | 15 (34.1%)                                 | <0.001  |
|                              |                                 | Persistence        | N (%)        | 18 (19%)      | 5 (11.4%)                            | 12 (34.3%)                                      | 1 (6.7%)                                   | 0.015   |
|                              |                                 | Duration (in Days) | Median (IQR) | 7 (3, 14)     | 5.5 (2, 13.2)                        | 12 (3, 27)                                      | 7 (3, 12.5)                                | 0.187   |
|                              |                                 | Duration Days >30  | N (%)        | 12 (13%)      | 4 (9.1%)                             | 6 (17.1%)                                       | 2 (13.3%)                                  | -       |
|                              |                                 | Duration Days >60  | N (%)        | 7 (7%)        | 3 (6.8%)                             | 3 (8.6%)                                        | 1 (6.7%)                                   | -       |
|                              | Anosmia/Hyposmia                | Symptom            | N (%)        | 314 (54%)     | 208 (57.8%)                          | 88 (50.6%)                                      | 18 (40.9%)                                 | 0.052   |
|                              |                                 | Persistence        | N (%)        | 49 (16%)      | 31 (14.9%)                           | 16 (18.2%)                                      | 2 (11.1%)                                  | 0.671   |
|                              |                                 | Duration (in Days) | Median (IQR) | 10 (6, 18)    | 10 (6, 17)                           | 12 (7, 20.5)                                    | 10 (3.2, 33.2)                             | 0.281   |
|                              |                                 | Duration Days >30  | N (%)        | 33 (11%)      | 18 (8.7%)                            | 10 (11.4%)                                      | 5 (27.8%)                                  | -       |
|                              |                                 | Duration Days >60  | N (%)        | 7 (2%)        | 4 (1.9%)                             | 2 (2.3%)                                        | 1 (5.6%)                                   | -       |
|                              | Headache                        | Symptom            | N (%)        | 374 (65%)     | 255 (70.8%)                          | 100 (57.5%)                                     | 19 (43.2%)                                 | <0.001  |
|                              |                                 | Persistence        | N (%)        | 63 (17%)      | 38 (14.9%)                           | 23 (23%)                                        | 2 (10.5%)                                  | 0.140   |
|                              |                                 | Duration (in Days) | Median (IQR) | 8 (4, 14)     | 7 (4, 14)                            | 10 (5, 20.2)                                    | 12 (4.5, 16)                               | 0.015   |
|                              |                                 | Duration Days >30  | N (%)        | 36 (10%)      | 19 (7.5%)                            | 16 (16%)                                        | 1 (5.3%)                                   | -       |
|                              |                                 | Duration Days >60  | N (%)        | 12 (3%)       | 7 (2.7%)                             | 5 (5%)                                          | 0 (0%)                                     | -       |
| Hypogeusia                   | Symptom                         | N (%)              | 351 (61%)    | 227 (63.1%)   | 105 (60.3%)                          | 19 (43.2%)                                      | 0.039                                      |         |
|                              | Persistence                     | N (%)              | 47 (13%)     | 25 (11%)      | 20 (19%)                             | 2 (10.5%)                                       | 0.126                                      |         |
|                              | Duration (in Days)              | Median (IQR)       | 10 (6, 17.2) | 8.5 (5.2, 15) | 13 (7, 20)                           | 10 (4, 23)                                      | 0.128                                      |         |
|                              | Duration Days >30               | N (%)              | 27 (8%)      | 16 (7%)       | 7 (6.7%)                             | 4 (21.1%)                                       | -                                          |         |
|                              | Duration Days >60               | N (%)              | 4 (1%)       | 3 (1.3%)      | 0 (0%)                               | 1 (5.3%)                                        | -                                          |         |
| Gastrointestinal (GIT)       | Any                             | Symptom            | N (%)        | 397 (69%)     | 244 (67.8%)                          | 128 (73.6%)                                     | 25 (56.8%)                                 | 0.084   |
|                              |                                 | Persistence        | N (%)        | 46 (12%)      | 25 (10.2%)                           | 17 (13.3%)                                      | 4 (16%)                                    | 0.532   |
|                              |                                 | Duration (in Days) | Median (IQR) | 7.5 (4, 14)   | 7 (4, 14)                            | 10 (5, 14)                                      | 10 (6, 20)                                 | 0.070   |
|                              |                                 | Duration Days >30  | N (%)        | 23 (6%)       | 13 (5.3%)                            | 10 (7.8%)                                       | 0 (0%)                                     | -       |
|                              |                                 | Duration Days >60  | N (%)        | 6 (2%)        | 3 (1.2%)                             | 3 (2.3%)                                        | 0 (0%)                                     | -       |
|                              | Abdominal pain                  | Symptom            | N (%)        | 99 (17%)      | 67 (18.6%)                           | 26 (14.9%)                                      | 6 (13.6%)                                  | 0.467   |

|         |                            |                    |              |              |             |                 |                 |        |
|---------|----------------------------|--------------------|--------------|--------------|-------------|-----------------|-----------------|--------|
|         |                            | Persistence        | N (%)        | 10 (10%)     | 5 (7.5%)    | 4 (15.4%)       | 1 (16.7%)       | 0.450  |
|         |                            | Duration (in Days) | Median (IQR) | 5 (3, 10.5)  | 5 (3, 11.5) | 5 (3, 9.8)      | 5 (5, 8.8)      | 0.911  |
|         |                            | Duration Days >30  | N (%)        | 3 (3%)       | 2 (3%)      | 1 (3.8%)        | 0 (0%)          | -      |
|         |                            | Duration Days >60  | N (%)        | 2 (2%)       | 2 (3%)      | 0 (0%)          | 0 (0%)          | -      |
|         | Anorexia                   | Symptom            | N (%)        | 270 (47%)    | 160 (44.4%) | 89 (51.1%)      | 21 (47.7%)      | 0.343  |
|         |                            | Persistence        | N (%)        | 16 (6%)      | 10 (6.2%)   | 5 (5.6%)        | 1 (4.8%)        | 0.953  |
|         |                            | Duration (in Days) | Median (IQR) | 10 (6, 14)   | 8 (5, 14)   | 10 (7, 14)      | 10 (4, 13)      | 0.393  |
|         |                            | Duration Days >30  | N (%)        | 16 (6%)      | 9 (5.6%)    | 7 (7.9%)        | 0 (0%)          | -      |
|         |                            | Duration Days >60  | N (%)        | 2 (1%)       | 0 (0%)      | 2 (2.2%)        | 0 (0%)          | -      |
|         | Diarrhea                   | Symptom            | N (%)        | 229 (40%)    | 137 (38.1%) | 82 (47.1%)      | 10 (22.7%)      | 0.008  |
|         |                            | Persistence        | N (%)        | 20 (9%)      | 9 (6.6%)    | 10 (12.2%)      | 1 (10%)         | 0.357  |
|         |                            | Duration (in Days) | Median (IQR) | 5 (2, 8)     | 4 (2, 7)    | 5.5 (2.2, 12.8) | 5 (3.5, 6.8)    | 0.254  |
|         |                            | Duration Days >30  | N (%)        | 6 (3%)       | 2 (1.5%)    | 4 (4.9%)        | 0 (0%)          | -      |
|         |                            | Duration Days >60  | N (%)        | 3 (1%)       | 2 (1.5%)    | 1 (1.2%)        | 0 (0%)          | -      |
|         | Nausea/Vomiting            | Symptom            | N (%)        | 161 (28%)    | 97 (26.9%)  | 53 (30.5%)      | 11 (25%)        | 0.633  |
|         |                            | Persistence        | N (%)        | 10 (6%)      | 5 (5.2%)    | 3 (5.7%)        | 2 (18.2%)       | 0.232  |
|         |                            | Duration (in Days) | Median (IQR) | 5 (2, 9)     | 4 (2, 7)    | 6 (2, 10)       | 4 (2.5, 9.5)    | 0.489  |
|         |                            | Duration Days >30  | N (%)        | 4 (2%)       | 2 (2.1%)    | 2 (3.8%)        | 0 (0%)          | -      |
|         |                            | Duration Days >60  | N (%)        | 0 (0%)       | 0 (0%)      | 0 (0%)          | 0 (0%)          | -      |
| General | Any                        | Symptom            | N (%)        | 529 (92%)    | 322 (89.4%) | 163 (93.7%)     | 44 (100%)       | 0.028  |
|         |                            | Persistence        | N (%)        | 141 (27%)    | 76 (23.6%)  | 51 (31.3%)      | 14 (31.8%)      | 0.141  |
|         |                            | Duration (in Days) | Median (IQR) | 14 (7, 25.8) | 13 (7, 21)  | 15 (10, 30)     | 19 (9.5, 31)    | <0.001 |
|         |                            | Duration Days >30  | N (%)        | 89 (17%)     | 43 (13.4%)  | 34 (20.9%)      | 12 (27.3%)      | -      |
|         |                            | Duration Days >60  | N (%)        | 21 (4%)      | 8 (2.5%)    | 11 (6.7%)       | 2 (4.5%)        | -      |
|         | Chills                     | Symptom            | N (%)        | 296 (51%)    | 183 (50.8%) | 94 (54%)        | 19 (43.2%)      | 0.426  |
|         |                            | Persistence        | N (%)        | 11 (4%)      | 6 (3.3%)    | 4 (4.3%)        | 1 (5.3%)        | 0.860  |
|         |                            | Duration (in Days) | Median (IQR) | 6 (3, 10)    | 5 (3, 9)    | 6.5 (3, 11.8)   | 10 (5, 11)      | 0.101  |
|         |                            | Duration Days >30  | N (%)        | 10 (3%)      | 4 (2.2%)    | 6 (6.4%)        | 0 (0%)          | -      |
|         |                            | Duration Days >60  | N (%)        | 3 (1%)       | 2 (1.1%)    | 1 (1.1%)        | 0 (0%)          | -      |
|         | Fever                      | Symptom            | N (%)        | 344 (60%)    | 194 (53.9%) | 113 (64.9%)     | 37 (84.1%)      | <0.001 |
|         |                            | Persistence        | N (%)        | 0 (0%)       | 0 (0%)      | 0 (0%)          | 0 (0%)          | -      |
|         |                            | Duration (in Days) | Median (IQR) | 6 (3, 10)    | 5 (3, 10)   | 7 (4, 12)       | 7 (4, 10)       | 0.006  |
|         |                            | Duration Days >30  | N (%)        | 4 (1%)       | 2 (1%)      | 2 (1.8%)        | 0 (0%)          | -      |
|         |                            | Duration Days >60  | N (%)        | 0 (0%)       | 0 (0%)      | 0 (0%)          | 0 (0%)          | -      |
|         | Myalgia                    | Symptom            | N (%)        | 333 (58%)    | 212 (58.9%) | 96 (55.2%)      | 25 (56.8%)      | 0.713  |
|         |                            | Persistence        | N (%)        | 49 (15%)     | 23 (10.8%)  | 18 (18.8%)      | 8 (32%)         | 0.008  |
|         |                            | Duration (in Days) | Median (IQR) | 10 (5, 18.8) | 7 (4, 14.8) | 14 (7, 25)      | 15.5 (7, 27)    | <0.001 |
|         |                            | Duration Days >30  | N (%)        | 32 (10%)     | 16 (7.5%)   | 11 (11.5%)      | 5 (20%)         | -      |
|         |                            | Duration Days >60  | N (%)        | 7 (2%)       | 1 (0.5%)    | 5 (5.2%)        | 1 (4%)          | -      |
|         | New or increased Fatigue   | Symptom            | N (%)        | 450 (78%)    | 272 (75.6%) | 141 (81%)       | 37 (84.1%)      | 0.210  |
|         |                            | Persistence        | N (%)        | 119 (26%)    | 64 (23.5%)  | 43 (30.5%)      | 12 (32.4%)      | 0.216  |
|         |                            | Duration (in Days) | Median (IQR) | 14 (7, 28)   | 14 (7, 21)  | 19 (10, 30)     | 23.5 (10, 31.5) | <0.001 |
|         |                            | Duration Days >30  | N (%)        | 83 (18%)     | 38 (14%)    | 33 (23.4%)      | 12 (32.4%)      | -      |
|         |                            | Duration Days >60  | N (%)        | 19 (4%)      | 7 (2.6%)    | 10 (7.1%)       | 2 (5.4%)        | -      |
|         | Unable to sleep lying down | Symptom            | N (%)        | 164 (28%)    | 83 (23.1%)  | 65 (37.4%)      | 16 (36.4%)      | 0.001  |

|                                           |                             |                    |              |             |              |               |                |        |
|-------------------------------------------|-----------------------------|--------------------|--------------|-------------|--------------|---------------|----------------|--------|
|                                           |                             | Persistence        | N (%)        | 16 (10%)    | 9 (10.8%)    | 7 (10.8%)     | 0 (0%)         | 0.383  |
|                                           |                             | Duration (in Days) | Median (IQR) | 10 (5, 15)  | 7 (4, 14)    | 10 (7, 15)    | 10 (6.5, 15)   | 0.014  |
|                                           |                             | Duration Days >30  | N (%)        | 8 (5%)      | 3 (3.6%)     | 5 (7.7%)      | 0 (0%)         | -      |
|                                           |                             | Duration Days >60  | N (%)        | 2 (1%)      | 2 (2.4%)     | 0 (0%)        | 0 (0%)         | -      |
| Head, Eyes, Ears, Nose and Throat (HEENT) | Any                         | Symptom            | N (%)        | 347 (60%)   | 232 (64.4%)  | 95 (54.6%)    | 20 (45.5%)     | 0.011  |
|                                           |                             | Persistence        | N (%)        | 31 (9%)     | 19 (8.2%)    | 10 (10.5%)    | 2 (10%)        | 0.786  |
|                                           |                             | Duration (in Days) | Median (IQR) | 7 (4, 14)   | 7 (4, 14)    | 10 (5, 19.5)  | 7 (4.8, 10.5)  | 0.073  |
|                                           |                             | Duration Days >30  | N (%)        | 22 (6%)     | 10 (4.3%)    | 11 (11.6%)    | 1 (5%)         | -      |
|                                           |                             | Duration Days >60  | N (%)        | 6 (2%)      | 2 (0.9%)     | 4 (4.2%)      | 0 (0%)         | -      |
|                                           | Nasal congestion/Rhinorrhea | Symptom            | N (%)        | 250 (43%)   | 169 (46.9%)  | 67 (38.5%)    | 14 (31.8%)     | 0.051  |
|                                           |                             | Persistence        | N (%)        | 18 (7%)     | 12 (7.1%)    | 5 (7.5%)      | 1 (7.1%)       | 0.995  |
|                                           |                             | Duration (in Days) | Median (IQR) | 7 (4, 14)   | 7 (4, 14)    | 7 (3, 14.5)   | 6 (4.2, 10)    | 0.918  |
|                                           |                             | Duration Days >30  | N (%)        | 14 (6%)     | 7 (4.1%)     | 6 (9%)        | 1 (7.1%)       | -      |
|                                           |                             | Duration Days >60  | N (%)        | 3 (1%)      | 2 (1.2%)     | 1 (1.5%)      | 0 (0%)         | -      |
|                                           | Sore throat                 | Symptom            | N (%)        | 255 (44%)   | 171 (47.5%)  | 68 (39.1%)    | 16 (36.4%)     | 0.104  |
|                                           |                             | Persistence        | N (%)        | 18 (7%)     | 11 (6.4%)    | 6 (8.8%)      | 1 (6.2%)       | 0.802  |
|                                           |                             | Duration (in Days) | Median (IQR) | 7 (4, 13.5) | 5 (3, 10)    | 7.5 (5, 18.2) | 7 (4.8, 8.5)   | 0.002  |
|                                           |                             | Duration Days >30  | N (%)        | 14 (5%)     | 5 (2.9%)     | 9 (13.2%)     | 0 (0%)         | -      |
|                                           |                             | Duration Days >60  | N (%)        | 4 (2%)      | 1 (0.6%)     | 3 (4.4%)      | 0 (0%)         | -      |
| Respiratory                               | Any                         | Symptom            | N (%)        | 511 (88%)   | 300 (83.3%)  | 169 (97.1%)   | 42 (95.5%)     | <0.001 |
|                                           |                             | Persistence        | N (%)        | 151 (30%)   | 77 (25.7%)   | 62 (36.7%)    | 12 (28.6%)     | 0.042  |
|                                           |                             | Duration (in Days) | Median (IQR) | 15 (7, 29)  | 11 (6, 21)   | 20 (11, 35)   | 21 (11.2, 30)  | <0.001 |
|                                           |                             | Duration Days >30  | N (%)        | 102 (20%)   | 44 (14.7%)   | 48 (28.4%)    | 10 (23.8%)     | -      |
|                                           |                             | Duration Days >60  | N (%)        | 27 (5%)     | 14 (4.7%)    | 12 (7.1%)     | 1 (2.4%)       | -      |
|                                           | Chest pain                  | Symptom            | N (%)        | 267 (46%)   | 158 (43.9%)  | 91 (52.3%)    | 18 (40.9%)     | 0.144  |
|                                           |                             | Persistence        | N (%)        | 50 (19%)    | 30 (19%)     | 18 (19.8%)    | 2 (11.1%)      | 0.684  |
|                                           |                             | Duration (in Days) | Median (IQR) | 10 (5, 20)  | 7 (5, 15)    | 12 (7, 25)    | 12 (5.5, 19.2) | 0.028  |
|                                           |                             | Duration Days >30  | N (%)        | 33 (12%)    | 16 (10.1%)   | 15 (16.5%)    | 2 (11.1%)      | -      |
|                                           |                             | Duration Days >60  | N (%)        | 9 (3%)      | 7 (4.4%)     | 2 (2.2%)      | 0 (0%)         | -      |
|                                           | Cough                       | Symptom            | N (%)        | 385 (67%)   | 223 (61.9%)  | 129 (74.1%)   | 33 (75%)       | 0.009  |
|                                           |                             | Persistence        | N (%)        | 74 (19%)    | 39 (17.5%)   | 29 (22.5%)    | 6 (18.2%)      | 0.513  |
|                                           |                             | Duration (in Days) | Median (IQR) | 13 (6, 21)  | 10 (5, 20)   | 15 (9, 29)    | 17 (8, 26)     | <0.001 |
|                                           |                             | Duration Days >30  | N (%)        | 58 (15%)    | 25 (11.2%)   | 27 (20.9%)    | 6 (18.2%)      | -      |
|                                           |                             | Duration Days >60  | N (%)        | 12 (3%)     | 5 (2.2%)     | 6 (4.7%)      | 1 (3%)         | -      |
|                                           | Dyspnea at rest             | Symptom            | N (%)        | 237 (41%)   | 99 (27.5%)   | 107 (61.5%)   | 31 (70.5%)     | <0.001 |
|                                           |                             | Persistence        | N (%)        | 19 (8%)     | 8 (8.1%)     | 9 (8.4%)      | 2 (6.5%)       | 0.939  |
|                                           |                             | Duration (in Days) | Median (IQR) | 8 (4, 15)   | 6 (4, 14)    | 10 (5, 17.5)  | 11 (7, 20.5)   | 0.004  |
|                                           |                             | Duration Days >30  | N (%)        | 18 (8%)     | 10 (10.1%)   | 7 (6.5%)      | 1 (3.2%)       | -      |
|                                           |                             | Duration Days >60  | N (%)        | 4 (2%)      | 3 (3%)       | 0 (0%)        | 1 (3.2%)       | -      |
|                                           | Dyspnea with exertion       | Symptom            | N (%)        | 363 (63%)   | 168 (46.7%)  | 156 (89.7%)   | 39 (88.6%)     | <0.001 |
|                                           |                             | Persistence        | N (%)        | 72 (20%)    | 30 (17.9%)   | 34 (21.8%)    | 8 (20.5%)      | 0.670  |
|                                           |                             | Duration (in Days) | Median (IQR) | 11 (7, 21)  | 10 (5, 15.5) | 15 (7, 28)    | 11 (7, 25)     | 0.002  |
|                                           |                             | Duration Days >30  | N (%)        | 57 (16%)    | 22 (13.1%)   | 30 (19.2%)    | 5 (12.8%)      | -      |
|                                           |                             | Duration Days >60  | N (%)        | 16 (4%)     | 9 (5.4%)     | 6 (3.8%)      | 1 (2.6%)       | -      |

|      |                             |                    |              |                |             |               |                 |        |
|------|-----------------------------|--------------------|--------------|----------------|-------------|---------------|-----------------|--------|
|      | Hemoptysis                  | Symptom            | N (%)        | 24 (4%)        | 8 (2.2%)    | 12 (6.9%)     | 4 (9.1%)        | 0.009  |
|      |                             | Persistence        | N (%)        | 1 (4%)         | 1 (12.5%)   | 0 (0%)        | 0 (0%)          | 0.352  |
|      |                             | Duration (in Days) | Median (IQR) | 4 (2, 7)       | 3 (1.8, 4)  | 6 (2.8, 10.2) | 4 (2, 6.2)      | 0.235  |
|      |                             | Duration Days >30  | N (%)        | 0 (0%)         | 0 (0%)      | 0 (0%)        | 0 (0%)          | -      |
|      |                             | Duration Days >60  | N (%)        | 0 (0%)         | 0 (0%)      | 0 (0%)        | 0 (0%)          | -      |
|      | Increased sputum production | Symptom            | N (%)        | 161 (28%)      | 90 (25%)    | 58 (33.3%)    | 13 (29.5%)      | 0.127  |
|      |                             | Persistence        | N (%)        | 17 (11%)       | 7 (7.8%)    | 10 (17.2%)    | 0 (0%)          | 0.082  |
|      |                             | Duration (in Days) | Median (IQR) | 8 (4, 14)      | 7 (4, 11)   | 12 (7, 20.8)  | 6 (3, 14)       | <0.001 |
|      |                             | Duration Days >30  | N (%)        | 13 (8%)        | 6 (6.7%)    | 6 (10.3%)     | 1 (7.7%)        | -      |
|      |                             | Duration Days >60  | N (%)        | 3 (2%)         | 1 (1.1%)    | 1 (1.7%)      | 1 (7.7%)        | -      |
| Skin | New Skin findings           | Symptom            | N (%)        | 39 (7%)        | 25 (6.9%)   | 11 (6.3%)     | 3 (6.8%)        | 0.964  |
|      |                             | Persistence        | N (%)        | 12 (31%)       | 6 (24%)     | 5 (45.5%)     | 1 (33.3%)       | 0.436  |
|      |                             | Duration (in Days) | Median (IQR) | 10.5 (6.2, 21) | 9 (5.8, 21) | 10 (6, 21)    | 21 (16.5, 40.5) | 0.327  |
|      |                             | Duration Days >30  | N (%)        | 4 (10%)        | 3 (12%)     | 0 (0%)        | 1 (33.3%)       | -      |
|      |                             | Duration Days >60  | N (%)        | 1 (3%)         | 1 (4%)      | 0 (0%)        | 0 (0%)          | -      |

## Figures

**Supplemental Figure 1. Median Symptom Duration, By Region and Symptom Severity.**

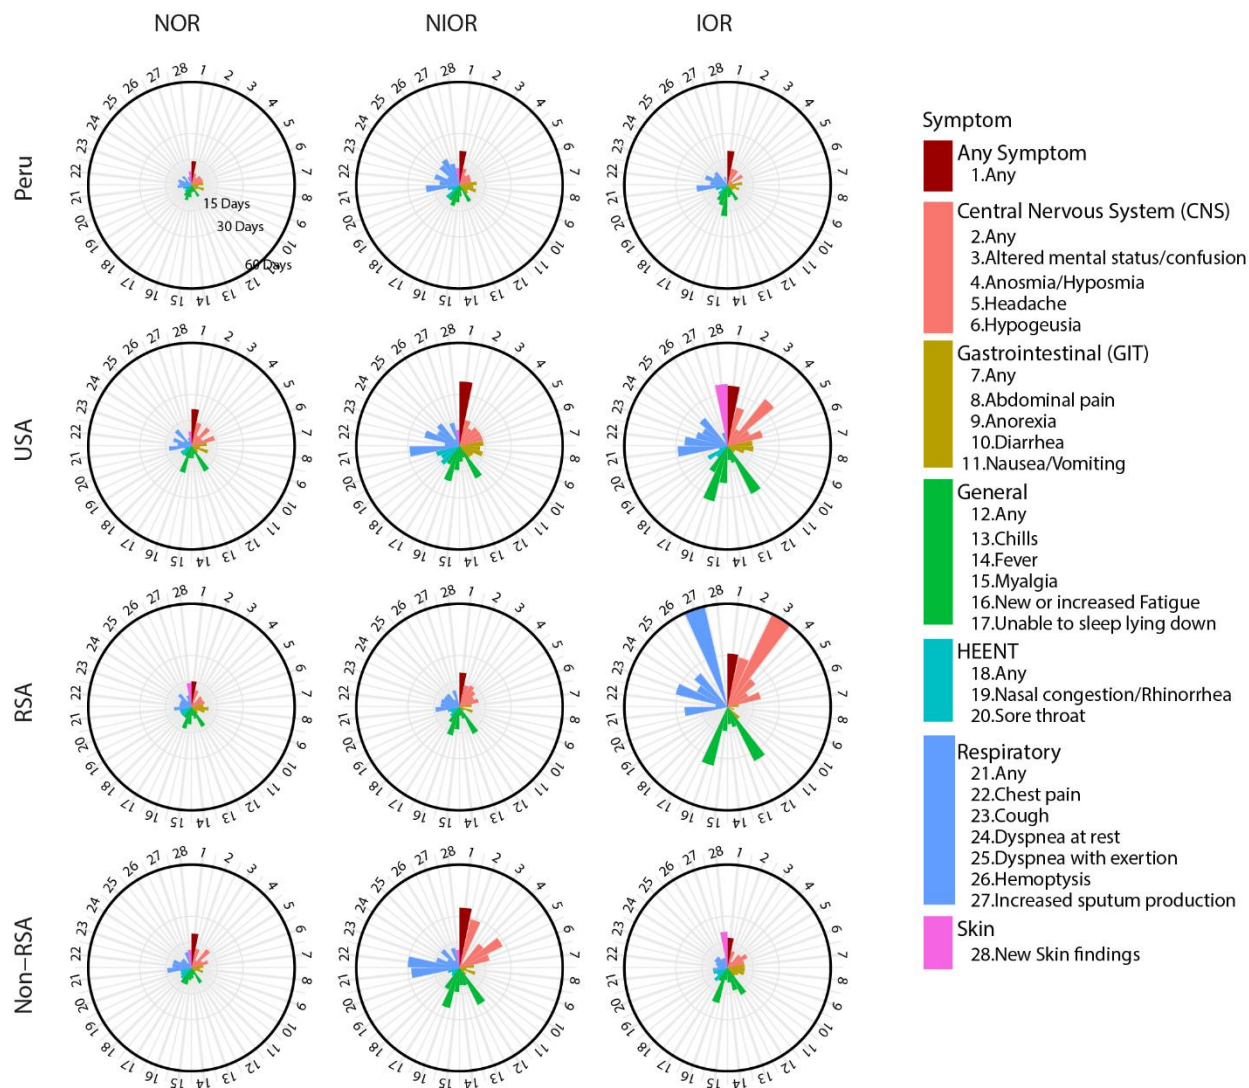



**Supplemental Figure 2. Symptom Persistence Beyond Acute COVID-19 Resolution and Symptom Duration by COVID-19 Severity.**

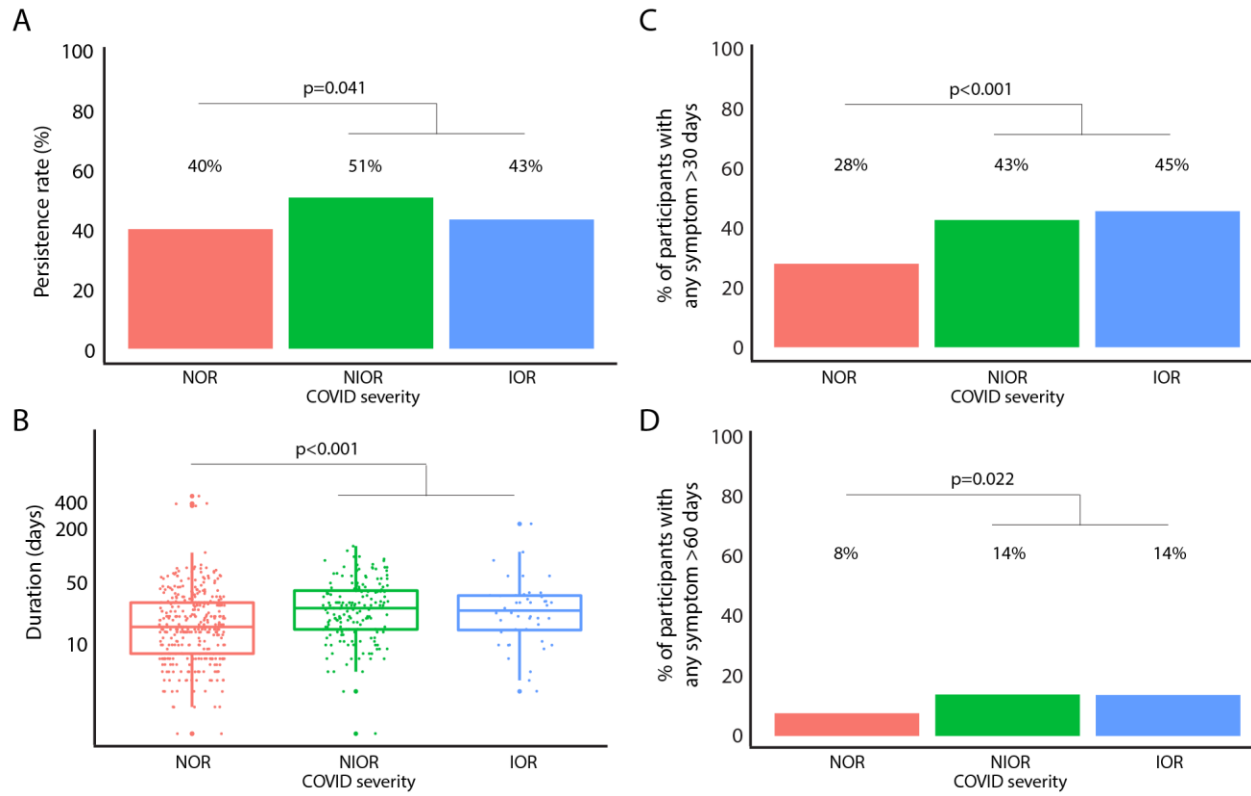

Supplement: jogh-13-06020-s001.pdf [file jogh-13-06020-s001.pdf]
